## Facultative chemosynthesis in a deep-sea anemone from hydrothermal vents in the Pescadero Basin, Gulf of California

**Authors:** Shana K Goffredi<sup>1\*</sup>, Cambrie Motooka<sup>1</sup>, David A. Fike<sup>2</sup>, Luciana C Gusmão<sup>3</sup>, Ekin Tilic<sup>4</sup>, Greg W Rouse<sup>5</sup>, Estefanía Rodríguez<sup>3</sup>

<sup>1</sup> Occidental College, LA USA,

<sup>2</sup> Washington University, St Louis, MO USA,

<sup>3</sup> American Museum of Natural History, NY USA,

<sup>4</sup> University of Bonn, Germany,

<sup>5</sup> Scripps Institution of Oceanography, CA USA

\*To whom correspondence may be addressed. Email: [sgoffredi@oxy.edu](mailto:sgoffredi@oxy.edu)

**Keywords (3-10):** Actiniaria, chemoautotrophic, SUP05, Gulf of California, Pescadero Basin, sulfide-oxidizing, symbiosis, chemosynthetic, *Ostiactis*

1 **Abstract:**

2 *Background*

3 Numerous deep-sea invertebrates have formed symbiotic associations with internal  
4 chemosynthetic bacteria in order to harness inorganic energy sources typically  
5 unavailable to most animals. Despite success in nearly all marine habitats and their well-  
6 known associations with photosynthetic symbionts, Cnidaria remain one of the only  
7 phyla without a clear dependence on hydrothermal vents and reliance on chemosynthetic  
8 bacterial symbionts specifically.

9  
10 *Results*

11 A new chemosynthetic symbiosis between the sea anemone *Ostiactis pearseae* (Daly &  
12 Gusmão, 2007) and intracellular bacteria was discovered at ~3700 m deep hydrothermal  
13 vents in the southern Pescadero Basin, Gulf of California. Unlike most sea anemones  
14 observed from chemically-reduced habitats, this species was observed in and amongst  
15 vigorously venting fluids, side-by-side with the chemosynthetic tubeworm *Oasisia* aff.  
16 *alvinae*. Individuals of *O. pearseae* displayed carbon, nitrogen, and sulfur tissue isotope  
17 values (average  $\delta^{13}\text{C}$  -29.1‰,  $\delta^{15}\text{N}$  1.6‰, and  $\delta^{34}\text{S}$  -1.1‰) suggestive of a distinct  
18 nutritional strategy from conventional Actiniaria suspension feeding or prey capture.  
19 Molecular and microscopic evidence confirmed the presence of intracellular SUP05-  
20 related bacteria housed in the tentacle epidermis of *O. pearseae* specimens collected from  
21 5 hydrothermally-active structures within two vent fields ~2 km apart. SUP05 bacteria  
22 dominated the *O. pearseae* bacterial community (64-96% of the total bacterial  
23 community based on 16S rRNA sequencing), but were not recovered from other nearby  
24 anemones, and were generally rare in the surrounding water (< 7% of the total  
25 community). Further, the specific *Ostiactis*-associated SUP05 phylotypes were not  
26 detected in the environment, indicating a specific association. Two unusual candidate  
27 bacterial phyla (the OD1 and BD1-5 groups) also appeared to associate exclusively with  
28 *O. pearseae* and may play a role in symbiont sulfur cycling.

29  
30 *Conclusion*

31 *Ostiactis pearseae* represents the first member of Cnidaria described to date to have a  
32 physical and nutritional alliance with chemosynthetic bacteria. The facultative nature of  
33 this symbiosis is consistent with the dynamic relationships formed by both the SUP05  
34 bacterial group and Anthozoa. The advantages gained by appropriating metabolic and  
35 structural resources from each other presumably contribute to their striking abundance in  
36 the Pescadero Basin, at the deepest known hydrothermal vents in the Pacific Ocean.

37

38

## 39 Background

40

41 Numerous deep-sea annelids, molluscs, and other invertebrates have forged relationships  
42 with bacteria in order to harness inorganic sources of energy that are typically  
43 unavailable to most animals. Microbial chemosynthesis generates energy through the  
44 oxidation of sulfide, as an example, used to fuel the production of organic carbon, which  
45 can be shared with a receptive animal host. To date, members of at least six major animal  
46 clades, including most recently *Trichoplax* (Placozoa), have formed symbiotic  
47 associations with internal chemosynthetic bacteria (Dubilier 2008; Gruber-Vodicka et al.  
48 2019). Interestingly, Cnidaria, although well-known to host photosynthetic symbionts,  
49 remains one of the last prominent animal clades without a documented metabolic  
50 dependence on chemosynthetic bacterial symbionts for survival in hydrothermal vents.

51

52 Anthozoa, which includes sea anemones and corals, is among the most successful and  
53 diverse group of Cnidaria, found in all marine habitats at most depths and latitudes (Daly  
54 et al. 2008). Their worldwide ecological success may best be attributed to an ability to  
55 form symbiotic relationships with other organisms, including microbial eukaryotes (e.g.  
56 the dinoflagellate *Symbiodinium*; LaJeunesse et al. 2018), as in the case of shallow-water  
57 tropical species. Anthozoa such as sea anemones, octocorals and zoanthids are also found  
58 at deep-sea reducing environments, such as hydrothermal vents, seeps, and whalefalls  
59 (Daly and Gusmão 2007; Zelnio et al 2009; Rodríguez et al. 2012; Breedy et al. 2019),  
60 however they have been historically understudied, and most remain undescribed. It would  
61 be reasonable, and perhaps even expected, for some of these deep-sea Anthozoa to also  
62 host microbial symbionts. In fact, a recent study demonstrated an affiliation between  
63 sulfide-oxidizing bacteria and certain species of Anthozoa found near deep-sea methane  
64 seeps, however the specific mode and importance of this relationship is not yet known  
65 (Vohsen et al. 2020).

66

67 The recently discovered Pescadero Basin vent field at 3700 m depth in the southern Gulf  
68 of California differs markedly from nearby vent localities (e.g. Guaymas Basin and 21°N  
69 East Pacific Rise) in physical, chemical, and biological attributes (Caress et al. 2015;  
70 Goffredi et al. 2017; Paduan et al. 2018). In particular, the vents in the Pescadero Basin  
71 are uniquely composed of hydrothermal calcite, with venting fluids that contain high  
72 levels of aromatic hydrocarbons, hydrogen, methane and hydrogen sulfide at a pH of ~6.5  
73 (Goffredi et al. 2017). The Pescadero Basin vents are also highly unusual in faunal  
74 composition with many new species and numerous others that do not occupy nearby  
75 regional vents (e.g. Alarcon Rise vents; Rouse et al. 2016; Goffredi et al. 2017; Hatch et  
76 al. 2020). Included in this group of unusual fauna was a very abundant white sea  
77 anemone (up to 68 individuals m<sup>-2</sup> in some areas) that occurred in and amongst the  
78 siboglinid tubeworm *Oasisia* aff. *alvinae*, often very near to actively venting fluids (Fig.

79 1; Supplemental Video; Goffredi et al. 2017).

80 Previously, several unidentified Pescadero Basin Actiniaria (sea anemones) were reported  
81 to be quite depleted in tissue  $\delta^{13}\text{C}$  values (-33 to -38‰; Goffredi et al. 2017; Salcedo et  
82 al. 2019). This evidence, along with their unusual life position and abundance in zones of  
83 active fluid venting, hinted at their possible nutritional reliance on chemoautotrophic  
84 carbon production, as opposed to traditional suspension feeding or prey capture via  
85 cnidae, however, the specific details were not explored further. Here, by combining  
86 microbial community profiling, ultrastructural analysis via microscopy, and stable  
87 isotope measurements, we document the first species of chemosynthetic sea anemone at  
88 vents deep in the Gulf of California, identified as *Ostiactis pearseae* (previously known  
89 only from whalefalls; Daly and Gusmão 2007). This extensive new population of *O.*  
90 *pearseae* appears to rely on nutritional supplementation of carbon, nitrogen, and sulfur by  
91 intracellular bacteria within the SUP05 clade, housed in their epidermis.

92

## 93 **Results**

94 Actiniaria of various morphotypes were observed to be one of only a handful of dominant  
95 animal species in both the Pescadero Basin Auka vent field (Goffredi et al. 2017; Paduan  
96 et al. 2018) and the newly discovered JaichMaa 'ja'ag vent field, both within ~2 km of  
97 each other in the Gulf of California (Fig. 1). A conspicuous white actinarian species  
98 visually represented a significant fraction of the animal community and was collected  
99 from 5 vent edifices in zones of active venting, very near to the obligate vent tubeworm,  
100 *Oasisia* aff. *alvinae* (Fig. 1). Several other sea anemones (by morphotype) were observed  
101 and collected near these same sites, usually in areas of less active fluid flow (Table 1).  
102 The white actinarian morphotype was identified as *Ostiactis pearseae* (Daly and  
103 Gusmão, 2007), based on anatomical, cnidae and DNA sequencing of preserved polyps.  
104 The Pescadero Basin populations of *O. pearseae* showed slight differences in  
105 morphology and cnidae to the description of specimens from the type locality and, thus,  
106 an amendment to the species diagnosis is provided.

107 Class Anthozoa Ehrenberg, 1834

108 Subclass Hexacorallia Haeckel, 1896

109 Order Actiniaria Hertwig, 1882

110 Suborder Enthemonae Rodríguez and Daly, 2014 in Rodríguez et al. 2014

111 Superfamily Metridioidea Carlgren, 1893

112 Family Ostiactinidae Rodríguez et al. 2012

113 Genus *Ostiactis* Rodríguez et al. 2012

114 *Ostiactis pearseae* (Daly & Gusmão, 2007)

115 (Figures 2-3, Table 2; Table S2)

116

117 Diagnosis: (amended after Daly and Gusmão, 2007 and Rodríguez et al. 2012,  
118 modifications in italics). Ostiactinidae with basilar muscles and mesogleal marginal  
119 sphincter. Body with well-developed base. Column not clearly divisible into scapus and  
120 scapulus; scapus without cuticle, *maybe* with scattered demarcated suckers distally;  
121 column without cinclides *or with a distal row of round papillae with inconspicuous*  
122 *cinclides*. Tentacles regularly arranged, not thickened on the aboral side. Six pairs of  
123 perfect and fertile mesenteries, hexamerously arranged, not divisible into macro- and  
124 micro-cnemes. *Same number of mesenteries proximally and distally*. Retractor muscles  
125 weak but *restricted*. No acontia. *Some populations with chemosynthetic bacteria in*  
126 *tentacles*. Cnidom: Robust spirocysts, basitrichs, holotrichs, and *p-mastigophores A and*  
127 *B1*. *Ostiactis pearseae* had been previously collected only in deep-sea waters (2800 m  
128 depth) of the Eastern Pacific, at a whalefall habitat in Monterey Bay (Daly & Gusmão  
129 2007). Newly collected specimens are from deep-sea waters (3655-3692 m depth)  
130 associated with Southern Pescadero Basin hydrothermal vents (Diane's vent) in the Gulf  
131 of California (Pacific Ocean).

132

133 Intrapopulation variability in morphology was observed in the Pescadero Basin *Ostiactis*  
134 *pearseae* specimens (Fig. 2). Differences were observed mainly in the abundance and  
135 categories of cnidae among specimens (particularly holotrichs in the column), but also in  
136 the presence of a distal row of papillae (with only basitrichs) associated with  
137 inconspicuous cinclides in two specimens (SO197-S2 and SO200-R2; Fig. 2). Because of  
138 the small size of the papillae, the relatively small sizes and state of contraction and  
139 preservation condition of the specimens, it is not definitive that this row of distal papillae  
140 is only present in these two individuals. Nevertheless, the rest of the morphological and  
141 molecular characters, as well as the cnidae data, from the specimens with distal papillae  
142 agree with those of the other specimens studied, suggesting that differences should be  
143 treated as intrapopulation variation. Morphologically, specimens of *O. pearseae* from the  
144 Pescadero Basin possess ~70 tentacles, compared to specimens of similar sizes from the  
145 type locality, described as having ~100 tentacles (Daly & Gusmão 2007), with some  
146 having poorly demarked suckers in the column (which were not observed in Pescadero  
147 Basin specimens). Additionally, the first and second cycles of mesenteries are fertile in  
148 the type specimens, with males observed brooding larvae internally in the tentacles (Daly  
149 & Gusmão 2007). Although the fertility of the first cycle could not be confirmed for the  
150 Pescadero Basin specimens, the second and third cycles were confirmed to be fertile, but  
151 no brooding individuals were identified. The previous implementation of a different  
152 cnidae terminology suggests conspicuous differences in cnidae types and sizes between  
153 specimens at the Monterey Canyon whalefall and Pescadero Basin (Table 2), but a new  
154 more precise combined terminology used here allows for distinction within *p-*  
155 *mastigophore* capsules (i.e. *p-mastigophores A* and *p-mastigophores B1*). The types and  
156 size ranges of the original description and the newly collected specimens of *O. pearseae*

157 mostly agree (with only slight variability in some size ranges), with the only distinct  
158 difference being the presence of *p*-mastigophores B1 capsules in the tentacles of the  
159 whalefall specimens, and not the Pescadero Basin specimens (Table 2).

160

161 All molecular phylogenetic analyses, based on the concatenated mitochondrial 12S  
162 rDNA, 16S rDNA, COIII genes and partial nuclear 18S rDNA gene were congruent and  
163 revealed a well-supported clade comprised of specimens of *Ostiactis pearseae* from  
164 Pescadero Basin and the type locality of Monterey Canyon (Fig. 3). DNA sequences from  
165 the Pescadero Basin specimens were identical to the Monterey Canyon population for 3  
166 of the genes analyzed, and only differed from the type locality by 1-bp for the 16S rDNA  
167 gene. *Ostiactis* was recovered within Metridioidea, as sister to a weakly supported clade  
168 formed by deep-sea Actiniaria and those associated with chemosynthetic environments  
169 (e.g. clades Deepgina + Chemosynthina, as part of the family Kadosactinidae, sensu  
170 Rodríguez et al. 2012), a relationship consistent over different studies (e.g. Rodríguez et  
171 al. 2012, 2014; Grajales and Rodríguez 2016; Gusmão et al. 2019). Most representatives  
172 from these two clades are characterized by the loss of acontia (filament-like structures  
173 packed with nematocysts), the presence of which is a major synapomorphy for  
174 Metridioidea. The other actiniarian morphotype included here, identified as  
175 Kadosactinidae ‘sp.B’, was recovered (only mitochondrial sequence data available for  
176 this specimen) sister to *Alvinactis chessi*, a sea anemone inhabiting hydrothermal vents in  
177 the southwestern Pacific (Fig. 3; Zelnio et al. 2009).

178

### 179 ***Isotope signatures of Ostiactis pearseae from the Pescadero Basin***

180

181 Tissue stable  $\delta^{13}\text{C}$ ,  $\delta^{15}\text{N}$  and  $\delta^{34}\text{S}$  isotope values were significantly different for *Ostiactis*  
182 *pearseae* than other anthozoans at the Pescadero Basin vent fields (ex. zoanths; Fig.  
183 4A). For example, *O. pearseae* had  $\delta^{13}\text{C}$  tissue values of  $-29.1 \pm 4.6\text{‰}$  ( $n = 9$ ), while the  
184 others measured  $-20.6 \pm 2.7\text{‰}$  ( $n = 10$ ;  $\pm 1$  SD; ANOVA  $p = 0.0001$ ; Fig. 4A). Similarly,  
185 *O. pearseae* had much more negative  $\delta^{15}\text{N}$  tissue values of  $1.6 \pm 1.7\text{‰}$ , whereas the  
186 others measured  $10.6 \pm 6.3\text{‰}$ , a difference of  $\sim 9\text{‰}$  ( $\pm 1$  SD; ANOVA  $p = 0.0006$ ; Fig.  
187 4A). Low  $\delta^{15}\text{N}$  values were also observed in nearly all individuals of the Kadosactinidae  
188 ‘sp.B’ ( $\sim 0.5$ - $2.8$ ; Fig. 4A) collected at the same locality. By comparison, *O. pearseae* was  
189 significantly more negative in both tissue  $\delta^{13}\text{C}$  and  $\delta^{15}\text{N}$  than four methane seep-  
190 associated octocoral species recently reported on by Vohsen et al. 2020 (ANOVA  $p =$   
191  $0.0013$  and  $p < 0.00001$ , respectively,  $n = 21$ ; Fig. 4A). Finally, *O. pearseae* had  
192 significantly lower  $\delta^{34}\text{S}$  tissue values of  $-1.1 \pm 6.4\text{‰}$  ( $n = 7$ ), compared to other  
193 Pescadero Basin sea anemones ( $8.9 \pm 5.2\text{‰}$ ;  $n = 6$ ; ANOVA  $p = 0.008$ ), with comparable  
194 total tissue sulfur  $\sim 0.9$ - $1.9\%$  by weight (Fig. 4B).

195

196

197 ***Bacterial community analysis of *Ostiactis pearseae* from the Pescadero Basin***

198

199 In *Ostiactis pearseae*, the tentacles are smooth, tapering and relatively long when  
200 extended, with features similar to most other anemones, including cnidocytes (or  
201 cnidoblasts), cnidocysts and glandular cells, all common cellular components sea  
202 anemones tentacles (Fautin & Mariscal 1991). Daly & Gusmão (2007) did not detect the  
203 presence of bacteria in the type specimens of *O. pearseae* from Monterey Canyon,  
204 however, the unusual isotope signatures of the Pescadero Basin specimens (Goffredi et al.  
205 2017; Salcedo et al. 2019) prompted a more careful examination of this possibility.  
206 Indeed, bacterial community analysis via 16S rRNA Illumina barcoding revealed a  
207 dominance of the gammaproteobacteria SUP05 clade (64-96% of the bacterial  
208 community), comprising 6 putative sulfide-oxidizing bacterial OTUs (= phylotypes,  
209 clustered at 99% similarity) associated with the tentacles of Pescadero Basin *O. pearseae*  
210 (n = 8 specimens; Fig. 5, Table S1). This was in contrast to the sulfide-oxidizing  
211 gammaproteobacteria recovered from the nearby obligate vent tubeworms *Riftia*  
212 *pachyptila* and *Oasisia* aff. *alvinae* (100% identical to *Candidatus Endoriftia persephone*;  
213 Fig. 5A; Robidart et al. 2008). The SUP05 clade was not detected in association with 6  
214 other individual sea anemones (determined by morphotype or molecular sequencing) and  
215 the specific *Ostiactis*-associated SUP05 phylotypes were not detected in surrounding  
216 water samples (n = 3; Fig. 5). Three SUP05 OTUs comprised 5-7% of the bacterial  
217 community in the surrounding water column (Fig. 5A), but were distinct, based on the  
218 250-bp 16S rRNA Illumina barcode sequences (Fig. S1 inset).

219

220 NMDS ordination revealed the total bacterial community of *Ostiactis pearseae* to be  
221 strongly differentiated from those associated with zoanthid specimens (Analysis of  
222 Similarity (ANOSIM) R = 0.99, p = 0.002), the other unidentified sea anemone  
223 Kadosactinidae 'spB' (ANOSIM R = 0.87, p = 0.022), the water column samples  
224 (ANOSIM R = 1.00, p = 0.006), and the neighboring obligate vent tubeworms *Riftia*  
225 *pachyptila* and *Oasisia* aff. *alvinae* (ANOSIM R = 1.00, p = 0.001; Fig. 5C). Bacterial  
226 community analysis revealed limited diversity within the tentacles of *O. pearseae* from  
227 the 5 different Pescadero Basin vent sites (Fig. 5A; Table S1). Other bacteria uniquely  
228 recovered from *O. pearseae* tentacles included the BD1-5 group (a.k.a. Gracilibacteria;  
229 present in 5/8 *O. pearseae* specimens at 3-27%) and the OD1 group (a.k.a. Parcubacteria;  
230 present in 5/8 *O. pearseae* specimens at 1-16%; Fig. 5A). Additional bacterial groups  
231 present in non-*Ostiactis* sea anemones included Enterobacteriaceae and Mollicutes (the  
232 latter 89% similar to one recovered from an ascidian; Fig. 5A; EF137402; Tait et al.  
233 2007). Microbial groups that were more common in all 3 water samples included the  
234 Methylococcales marine group 2 (MMG-2), Rhodobiacea, and Thaumarcheota (Fig. 5A).

235

236 To further characterize the SUP05 in association with *Ostiactis pearseae*, a longer region  
237 of the 16S rRNA gene was amplified via direct PCR and sequenced. A 1334-bp long 16S  
238 rRNA sequence, only 1-bp different from barcode OTU21762, was 96.5% similar to a  
239 free-living bacterium from a mud volcano in the Eastern Mediterranean Sea (AY592908;  
240 Heijs et al. 2005) and 95% similar to the thiotrophic symbiont of *Bathymodiolus* aff.  
241 *brevior* from Central Indian Ridge vents (DQ077891; McKiness and Cavanaugh 2005;  
242 Fig. S1). There are no *Bathymodiolus* mussels at the Pescadero Basin vents, and the  
243 SUP05-related sequences recovered from *O. pearseae* are distinct from those recovered  
244 from *Bathymodiolus* from Costa Rica seeps, some of the closest known mussel  
245 populations (only ~96% similar for 250bp barcode sequence; Fig. S1 inset; Levin et al.  
246 2012; McCowin et al. in press).

247  
248 Several genes were additionally amplified and directly sequenced in order to inform the  
249 possible metabolic capabilities of the SUP05-related bacteria in *O. pearseae*. The *napA*  
250 gene, encoding a catalytic subunit of the periplasmic nitrate reductase alpha subunit (E.C.  
251 1.7.99.4; Flanagan et al. 1999), amplified from *O. pearseae* tentacles, was most closely  
252 related (82-85% similarity based on amino acid translation; 77% based on nucleotides),  
253 to the *napA* gene from known SUP05 bacteria, including those from an estuary  
254 (ACX30474; Walsh et al. 2009) and the endosymbiont from *Bathymodiolus* mussel gill  
255 tissues (SMN16186). The *aprA* gene, encoding the adenosine phosphosulfate (or APS)  
256 reductase alpha subunit (E.C.1.8.99.2), recovered from *O. pearseae*, was most closely  
257 related to the *aprA* gene from the bacterial symbiont of a nematode from (96% similarity  
258 based on amino acid translation, ACF93728) and the endosymbiont of *Bathymodiolus*  
259 *septemdiarum* (81% similarity based on nucleotide sequence, AP013042; Fujiwara et al.  
260 2000).

261  
262 Abundant SUP05 bacteria were observed embedded within the tentacle epidermis of  
263 *Ostiactis pearseae* (Fig. 6). Fluorescent *in situ* signal amplification via hybridization  
264 chain reaction-FISH (HCR-FISH) was necessary to overcome the very highly  
265 autofluorescent cnidae produced by the epidermis (Fig. 6G). HCR-FISH and TEM  
266 microscopy revealed intracellular cocci-shaped cells (~0.5  $\mu$ m diameter), positioned just  
267 above or immediately adjacent to cnidae capsules and nuclei (Fig. 6G,I-J). These cells  
268 were definitively identified as members of the SUP05 group, given the consistent overlap  
269 between cells hybridized using a general bacterial probe set (Eub338-I-III) and a probe  
270 designed specifically to target the *O. pearseae* SUP05 (Fig. S2). Although poor tissue  
271 fixation somewhat compromised high-resolution electron microscopy (ex. many host  
272 cells were visibly ruptured with jumbled mitochondria), TEM provided additional  
273 evidence of symbiont integration within *O. pearseae*. Bacteria within the tentacles  
274 appeared concentrated in the periphery of cells within the mono-layered epidermis (Fig.  
275 6I). Additionally, glands with large electron dense vesicles were observed occasionally



276 between the very elongated bacteria-containing cells (Fig. 6G) and a layer of mucous was  
277 observed overlying the epidermis in some instances. Bacteria on the tentacle surface  
278 occasionally appeared to be in clathrin-coated pits in various stages of endocytosis (Fig.  
279 6L). For both microscopy methods, bacteria were not observed in either the gastrodermis  
280 or mesoglea of *O. pearseae* (Fig. 6G).

281

## 282 Discussion

283

284 A conspicuous actiniarian species, identified as *Ostiactis pearseae* (Daly & Gusmão,  
285 2007), was dominant at two neighboring hydrothermal vent fields in the Pescadero Basin,  
286 Gulf of California. Unlike most vent anemones, which are almost always observed in the  
287 vent periphery, this species was found very near to vigorous venting fluids on and among  
288 the obligate vent tubeworms *Oasisia* aff. *alvinae* and *Riftia pachyptila* (Fig. 1), known to  
289 rely exclusively on sulfide-based chemosynthesis for energy (Fisher et al. 1989; Van  
290 Dover & Fry 1989). *Ostiactis pearseae*, formerly named *Anthosactis pearseae* (see  
291 Rodríguez et al. 2012), had been originally described as the first and only endemic  
292 Actiniaria from a whalefall community (Daly & Gusmão 2007), however, this discovery  
293 at hydrothermal vents makes them one of the only sea anemones described from multiple  
294 chemosynthetic environments (Zelnio et al. 2009; Rodríguez et al. 2012). The  
295 assumption, until now, was that most sea anemones at hydrothermal vents and methane  
296 seeps acquire nutrients via suspension feeding. Daly & Gusmão (2007) previously found  
297 no evidence that *Ostiactis pearseae* harbored chemosynthetic bacteria and accepted that  
298 they fed upon dissolved and particulate organic matter and plankton. However, the  
299 significantly negative  $\delta^{13}\text{C}$  and  $\delta^{15}\text{N}$  tissue isotopic values of *O. pearseae* (at the time  
300 labeled as an unidentified species in Goffredi et al. 2017 and Salcedo et al. 2019),  
301 suggested an entirely different strategy dependent upon bacterial chemosynthesis.

302

303 Indeed, distinct bacterial phylotypes related to the SUP05-group were associated with  
304 *Ostiactis pearseae*, compared to other nearby sea anemones and water column bacterial  
305 communities. This association was pervasive and dominant, in that SUP05 bacteria were  
306 found in all 8 *O. pearseae* specimens analyzed, comprising up to 96% of the recovered  
307 microbial 16S rRNA genes. Sulfur-oxidizing bacteria within the SUP05 clade, named  
308 after discovery in the Suiyo seamount plume (Sunamura et al. 2004), have been found  
309 worldwide in marine oxygen-deficient marine environments, deep-sea hydrothermal  
310 systems, and productive upwelling regions (Labrenz et al. 2007; Ulloa et al. 2012;  
311 Glaubitz et al. 2013). They exist both as free-living cells (Walsh et al. 2009) and in  
312 association with animal hosts (ex. *Bathymodiolus* mussels and some sponges; Petersen et  
313 al. 2012), where they participate centrally in the provisioning of fixed carbon to the  
314 animal.

315

316 Intracellular SUP05 were observed exclusively in the epidermis of *Ostiactis pearseae*,  
317 which was unexpected given that most Cnidaria house symbionts, mainly photosynthetic,  
318 in the gastrodermis (McAuley 1985; Marlow & Martindale 2007; Mellas et al. 2014).  
319 Epidermal bacteriocyte-like structures containing *Vibrio* have been observed in  
320 *Exaiptasia pallida* (Palincsar et al. 1989) and bacterial ‘aggregates’ containing  
321 *Endozoicimonas* have been observed in epidermal ‘caverns’ in the sea anemone  
322 *Metridium senile* (Schuett et al. 2007). In both cases, however, the epidermal bacteria are  
323 pathogens commonly associated with animals (Preheim et al. 2011; Neave et al. 2016).  
324 Vohsen et al. (2020) reported SUP05, and other bacteria, associated with whole octocoral  
325 specimens, including mucous, however the specific location of these bacteria was not  
326 determined. Interestingly, bacteria on the tentacle surface of *O. pearseae* appeared to be  
327 in clathrin-coated pits in various stages of endocytosis. Further examination of this  
328 receptor-mediated process is necessary to establish whether bacteria are actively  
329 transported inside of host cells and if so, what influences the recognition and selectivity  
330 of this process.

331  
332 Hosting sulfide-oxidizing SUP05 in the outer epidermis may allow *Ostiactis pearseae* to  
333 avoid sulfide toxicity or the costly evolution of unique biochemistry to take up and  
334 transport sulfide (Goffredi et al. 1997). Additionally, the epidermis in Anthozoa can  
335 function in nutrition (Fautin & Mariscal 1991), even more so than the gastrodermis,  
336 through direct uptake of dissolved organic compounds (Schlichter 1975, 1980), thus the  
337 positioning of nutritional bacteria in the epidermis may increase effective exchange of  
338 small molecules. Like other SUP05 cells, those associated with the tentacles of *O.*  
339 *pearseae* were small (~500 nm in diameter; Shah et al. 2019). Presumably these  
340 symbionts require both oxygen and sulfide near simultaneously, for example “*Candidatus*  
341 *Thioglobus autotrophicus*”, a member of the SUP05 group, has an aerobic phenotype, and  
342 uses sulfide while respiring oxygen (Marshall and Morris 2013; Shah et al. 2019). In this  
343 regard, it would be reasonable to house bacteria as close to the tissue surface as possible  
344 in order to accommodate gas exchange and meet symbiont metabolic demands.

345  
346 The assumption that the SUP05 group may perform a nutritional role for the Pescadero  
347 Basin *Ostiactis pearseae* is evidenced by the comparatively light tissue  $\delta^{13}\text{C}$  values  
348 (average -29.1‰). The contribution of chemosynthesis-derived carbon to *O. pearseae*  
349 biomass appears to exceed that reported for deep-sea anthozoan species from the Gulf of  
350 Mexico (ex. *Swiftia* and *Acanthogorgia*; Vohsen et al. 2020). The facultative nature of the  
351 SUP05-Anthozoa symbioses proposed by Vohsen et al. 2020 is also suggested for *O.*  
352 *pearseae* given the large range in negative  $\delta^{13}\text{C}$  values observed. Like all sea anemones  
353 (even those with photosynthetic symbionts), *O. pearseae* retains an arsenal of  
354 nematocysts by which to capture prey, thus the SUP05 symbionts likely provide only a  
355 portion of their diet.

356

357 The SUP05 clade is not only involved in mediating dark carbon fixation, but also the  
358 cycling of nitrogen, whether by denitrification, as has been shown in free-living SUP05  
359 populations (Walsh et al. 2009; Glaubitz et al. 2013) or assimilatory nitrate reduction, as  
360 in the case of symbiotic SUP05 (Ikuta et al. 2016; Vohsen et al. 2020). Significant  
361 contribution to tissue nitrogen by microbial nitrate utilization may be possible for the  
362 SUP05 symbionts given the considerably low  $\delta^{15}\text{N}$  values in *O. pearseae* (average 1.6‰)  
363 and the successful amplification of the SUP05-related periplasmic nitrate reductase alpha  
364 subunit (*napA*) gene. The actual abundance of SUP05 symbionts per individual anemone  
365 is not known, nor is the regulation of carbon or nitrogen nutrient exchange, and thus the  
366 overall nutritional influence of the SUP05 bacteria is not yet quantifiable.

367 Finally, *Ostiactis pearseae* tissue  $\delta^{34}\text{S}$  values ( $\sim -1\text{‰}$ ) represented a large offset from  
368 typical marine biomass (16-21‰; Kaplan et al. 1963), where biogenic sulfur is sourced  
369 from seawater sulfate with minimal isotopic fractionation (21‰; Paris et al. 2013). The  
370 average  $\delta^{34}\text{S}$  observed in *O. pearseae* tissues is consistent with typical hydrothermal vent  
371 fauna (-5 to +5‰; Fry et al. 1983), which are known to incorporate a local source of  
372 sulfur (e.g. volcanic, thermally-altered sulfur at  $\sim 0\text{‰}$ ; Sakai et al. 1984; Canfield 2004)  
373 via internal symbioses or direct consumption of sulfide-oxidizing bacteria. However,  
374 several individuals of *O. pearseae* revealed even lower  $\delta^{34}\text{S}$  values (down to -11‰),  
375 which would likely require the additional incorporation of substantial sulfide produced  
376 via microbial sulfate reduction, which is expected to have a  $\delta^{34}\text{S}$  signature of -20‰ or  
377 lighter (Chambers & Trudinger 1979; Morse et al. 1987). The incorporation of sulfide  
378 sourced from dissimilatory sulfate reduction, rather than hydrothermal sulfide, has been  
379 similarly proposed for SUP05-hosting *Bathymodiolus* mussels from both Kakajima  
380 Island and the Kaikata Caldera, which had tissue  $\delta^{34}\text{S}$  values of -12‰ and -25‰,  
381 respectively, with a comparable tissue sulfur content of  $\sim 0.8\%$  (n = only 1 specimen  
382 each; Kim et al. 1989; Yamanaka et al. 2000). The wide range of  $\delta^{34}\text{S}$  values for *O.*  
383 *pearseae* tissues ( $\sim -11$  to 9‰), compared to other thiosymbiont-hosting animal species,  
384 could be due to a combination of traditional feeding by the host, variable sulfide  
385 oxidation by the SUP05 symbionts (e.g. utilization of  $\text{H}_2\text{S}$ ,  $\text{HS}^-$ , or other reduced S  
386 species, including endogenous elemental sulfur), or variation in the sulfur sourced from  
387 the petroleum-rich sediments of the Pescadero Basin.

388

389 Many uncultivated candidate bacterial phyla have been discovered in recent years within  
390 a variety of environments (Rinke et al. 2013; Kantor et al. 2013; Harris et al. 2014). They  
391 usually have small genomes (<1 Mb) with dramatically reduced biosynthetic capabilities,  
392 and yet exist globally in both marine and terrestrial habitats (Wrighton et al. 2012).  
393 Several of these candidate phyla, known as the OD1 and BD1-5 groups (also referred to  
394 as Parcubacteria and Gracilibacteria, respectively), comprised up to 16-27% of the

395 *Ostiactis pearseae* bacterial community, and are known to play an important role in  
396 sulfur cycling (Wrighton et al. 2012). Nelson and Stegan (2015) proposed an  
397 ectosymbiotic or parasitic lifestyle for the OD1, given their inability to synthesize  
398 vitamins, amino acids, nucleotides, and fatty acids. Additionally, while most candidate  
399 phyla are found in anoxic habitats, some OD1 genomes contained genes suggestive of O<sub>2</sub>  
400 use as a terminal electron acceptor (Brown et al. 2015; Nelson and Stegan 2015).  
401 Although not previously associated with the sulfide-oxidizing SUP05 group, or any  
402 specific proteobacterial group, the role of OD1 in sulfur reduction (Wrighton et al. 2012)  
403 and their diverse repertoire for attachment and adhesion (Nelson and Stegan 2015)  
404 forecasts a possible direct association with either the SUP05 bacteria or *O. pearseae*  
405 mucous, for example.

## 406 **Conclusion**

407  
408 Despite 40+ years of appreciation for chemosynthetic symbioses and the continued  
409 search for their occurrence in the most well-known habitats, Cnidaria have not been  
410 among the animals known to associate with chemoautotrophic bacteria. Here, we identify  
411 a hydrothermal vent sea anemone, *Ostiactis pearseae*, at 3700 m depth in the Pescadero  
412 Basin, Gulf of California, that appears to be nutritionally supported by internal  
413 chemoautotrophic bacteria. This species, one of only 2 dominant sessile animals observed  
414 on the vent chimneys, has an unusual life position, often located in and amongst vent-  
415 obligate siboglinid tubeworms, very near to actively venting fluids. *Ostiactis pearseae*  
416 houses putative sulfide-oxidizing SUP05 bacteria in its epidermis, with which it appears  
417 to have established a facultative nutritional symbiosis, based on a broad range of carbon,  
418 nitrogen, and sulfur isotopes. Facultative nutritional symbioses are often more difficult to  
419 recognize, compared to obligate alliances, but they are surely more common in nature  
420 (Goffredi et al. 2020), particularly in Cnidaria which experience symbiont gain and loss  
421 readily (ex. Jones et al. 2008; Larson et al. 2014; Vohsen et al. 2019). So, too, is the  
422 difficulty in uncovering nested symbioses, often involving microbe-microbe synergies. In  
423 this study, an unusual abundance of two candidate phyla, Parcubacteria and  
424 Gracilibacteria (a.k.a. OD1 and BD1-5, respectively) within *O. pearseae* tentacles, hints  
425 at the roles they may play in the cycling of nutrients within and on animal hosts. Cnidaria  
426 symbioses are considered foundational for coral reefs, and perhaps they also play an  
427 important role at hydrothermal vents. It would be worth investigating additional  
428 Anthozoa species observed to inhabit venting fluids at other sites worldwide (Doumenc  
429 & Van-Praët 1988; Sanamyan & Sanamyan 2007; Rogers et al. 2012), to see whether  
430 they have also forged nutritional relationships with chemosynthetic bacteria, such as the  
431 versatile SUP05 group.

432  
433  
434

435 **Figure Legends**

436

437 **Figure 1: Locations and in situ images of the actiniarian *Ostiactis pearseae***

438 **A.** Location of South Pescadero Basin (SPB) vent fields Auka (in B) and JaichMaa ‘ja’ag  
439 (in C). Inset shows location of SPB at the mouth of the Gulf of California between the tip  
440 of the Baja Peninsula and mainland Mexico. **B.** Auka vent field samples and chimneys.  
441 (samples symbolized as in C). **C.** JaichMaa ‘ja’ag vent field samples and chimneys.  
442 Legend shows the sample types. Maps A,B, and C show 1-m resolution bathymetry  
443 collected by mapping AUVs (owned and operated by the Monterey Bay Aquarium  
444 Research Institute). Color ramps show the depth ranges. **D-F.** Specimens of *Ostiactis*  
445 *pearseae* collected from both vent fields (shown as yellow squares in B and C), indicated  
446 by arrows. **G.** An individual *O. pearseae* near to the chemosynthetic tubeworms *Riftia*  
447 *pachyptila* and *Oasisia* aff. *alvinae*.

448

449 **Figure 2. *Ostiactis pearseae* external and internal anatomy, including cnidae**

450 **A-B.** External anatomy of *Ostiactis pearseae* from Pescadero Basin; (A) lateral view;  
451 (B) oral view. **C.** Detail of distal row of papillae in the column (arrows). **D.** Detail of  
452 longitudinal section through perforated papillae (cinclide). **E.** Longitudinal section of  
453 distal column showing mesogleal marginal sphincter muscle (area within rectangle). **F.**  
454 Cross section of a tentacle showing ectodermal longitudinal muscles (arrows). **G.** Cross  
455 section at the actinopharynx level showing cycles of mesenteries; numbers between  
456 mesenteries indicate different cycles. **H.** Detail of marginal sphincter muscle fibers in the  
457 mesoglea. **J.** Detail of developing oocytes and lipid inclusions (red small dots) in the  
458 gastrovascular cavity. **I.** Detail of spermatid cysts (arrow points to largest cyst). **K.**  
459 Cnidae types of *O. pearseae*: basitrichs (a, c, e, h, k), holotrichs (b, f), robust spirocysts  
460 (d, g), *p*-mastigophores A (i, l), *p*-mastigophores B1 (j, m). Abbreviations: ep, epidermis;  
461 ga, gastrodermis; me, mesoglea; pap, papillae. Scale bars: A-C, 6 mm; D, G, 1 mm; E,  
462 0.5 mm; F, H, I, J, 0.1 mm; K, 25  $\mu$ m.

463

464 **Figure 3. Phylogenetic placement of *Ostiactis pearseae***

465 Phylogenetic reconstruction resulting from maximum likelihood analysis using PhyML  
466 (RaxML results not shown, but congruent) of the concatenated dataset of three  
467 mitochondrial (12S rDNA, 16S rDNA, COIII) and a partial nuclear marker (18S rDNA).  
468 Dotted boxes indicate actiniarian suborders; colored triangles and green box indicate  
469 actiniarian superfamilies; empty boxes and arrows indicate relevant actiniarian clades.  
470 Position of *Ostiactis pearseae* specimens from Pescadero Basin vent communities is  
471 highlighted in the orange box; the position of an additional sea anemone (unidentified  
472 morphospecies Kadosactinidae ‘sp. B’) is indicated by the light orange box. Bootstrap  
473 resampling values indicated above branches; only support values > 50% are shown.

474

475 **Figure 4:  $^{13}\text{C}$ ,  $^{15}\text{N}$ ,  $^{34}\text{S}$  isotope signatures for *Ostiactis pearseae* and**  
476 **comparison actinarians**

477 **A.**  $\delta^{13}\text{C}$  and  $\delta^{15}\text{N}$  values for the tentacles of *Ostiactis pearseae* from the Pescadero Basin  
478 vents, compared to neighboring anthozoans, including unidentified zoanthids ('zoan')  
479 and sea anemone (Kadosactinidae 'sp. B'). Data for Pescadero Basin actinarians  
480 collected in 2015 (from Goffredi et al. 2017; red checkered triangles) as well as seep-  
481 associated corals from the Gulf of Mexico (Vohsen et al. 2020; purple circles) and  
482 unidentified anemones from Gorda Ridge hydrothermal vents (Van Dover & Fry 1994;  
483 purple squares) are also included. Data from Vohsen et al. 2020 was extracted from their  
484 Figure 7 using an online Web plot digitizer (<http://arohatgi.info/WebPlotDigitizer/>). **B.**  
485  $\delta^{34}\text{S}$  and tissue sulfide content (% dry weight) values for the tentacles of *O. pearseae*  
486 from the Pescadero Basin vents, compared to neighboring Anthozoa, including an  
487 unidentified zoanthid ('zoan') and sea anemone (Kadosactinidae 'sp. B'). *Bathymodiolus*  
488 *aduloides* from muddy sediments off of Kakaijima Island taken from Yamanaka et al.  
489 2000.

490

491 **Figure 5: Relative abundance of 16S rRNA bacterial phylotypes, recovered from**  
492 ***Ostiactis pearseae* and comparison samples**

493 **A.** Relative abundance of bacterial families from *Ostiactis pearseae* from the Pescadero  
494 Basin vents, compared to neighboring Anthozoa, including unidentified zoanthids  
495 ('zoan') and Kadosactinidae 'sp. B', nearby obligate vent tubeworms *Riftia pachyptila*  
496 and *Oasisia* aff. *alvinae*, and seawater. Each color on the graph represents a distinct  
497 family-level phylotype or lowest level available. The top 15 dominant family phylotypes  
498 are indicated in the key. For all others, see DataFile S1, including raw and processed  
499 data, as well as representative sequences for all dominant hits. **B.** Six distinct SUP05  
500 OTUs (99% 16S rRNA sequence similarity) recovered from *O. pearseae*, compared to  
501 the surrounding seawater. The heatmap scale reflects the number of reads per sample.  
502 Phylogenetic relationships between the SUP05 OTUs are shown in Figure S1. See also  
503 DataFile S1, for representative sequences of each OTU. **C.** Non-metric multidimensional  
504 scaling (NMDS) ordination of microbial communities associated with *O. pearseae*,  
505 versus the other neighboring species and overlying seawater. Each point represents all  
506 16S rRNA sequences recovered from a single specimen or sample. ANOSIM  $p < 0.022$ ,  
507 suggesting a significant difference between *O. pearseae* and any other sample set (ex.  
508 other sea anemones, water samples;  $R = 0.88-1.00$ ). HTV = hydrothermal vent. spB =  
509 another undescribed sea anemone (Kadosactinidae 'sp. B') from the Pescadero Basin.  
510 zoan = unidentified zoanthids from the Pescadero Basin.

511

512 **Figure 6. Microscopy of the tentacles of *Ostiactis pearseae***

513 **A.** Whole specimen image - SO194-S2, SIO-BIC Co3067. **B.** light microscopy of 3- $\mu\text{m}$   
514 sections embedded in Steedman's resin, and **C-G.** fluorescent *in situ* signal amplification

515 via hybridization chain reaction-FISH (HCR-FISH) microscopy of *Ostiactis pearseae*  
516 tentacles. An unlabeled probe (Anem\_SUP05), with a specific sequence initiator tag was  
517 designed to be an exact match to the putative thiotrophic symbiont (related to the SUP05  
518 clade). This probe was then amplified via HCR-FISH using DNA hairpins labelled with  
519 Alexa488, shown in green. DAPI-stained nuclei of host cells are shown in blue. **F-G.**  
520 Bacteria can be seen within the epidermis, in and amongst nuclei, positioned just above  
521 or immediately adjacent to cnidocysts. **H-I.** Light microscopy of *O. pearseae* tentacles. **J-**  
522 **L.** Transmission electron (TEM) microscopy of *O. pearseae* tentacles. **I.** Bacteria are  
523 concentrated in the periphery of elongated epidermal cells (designated by the orange box,  
524 which corresponds to the area of TEM imagery), and positioned near cnidae, shown in  
525 pink arrowheads. No bacteria were observed in the mesogloea or gastrodermis. **J.** Close-  
526 up of bacteria near a cnidocyst capsule, with enclosed tubule. **K.** Close-up showing clear  
527 membranes surrounding the bacterial cells, designated by orange arrowheads. **L.**  
528 Arrowheads (in green) point to bacteria possibly being endocytized via clathrin-coated  
529 pits, as well as nearby clusters of bacterial cells within the elongated epidermal cells of  
530 *O. pearseae*. nu, nucleus. bac, bacteria. cni, cnidae. meso, mesogloea. gastro,  
531 gastrodermis. epi, epidermis. Scale bars are 5 mm (A), 2 mm (B), 50  $\mu$ m (C), 1  $\mu$ m (D),  
532 10  $\mu$ m (E-G), 250  $\mu$ m (H), 25  $\mu$ m (I), 1  $\mu$ m (J-L).

533 **Methods**

534

535 ***Specimen Collections***

536 All specimens and water samples were collected from active vent sites within the  
537 Pescadero Basin, Gulf of California (~ 3700 m depth), using the ROV *SuBastian* during  
538 the R/V *Falkor* expedition FK103118 (October-November 2018), specifically from six  
539 sites at two vent fields within ~2 km of each other; the previously described Auka vent  
540 field (refs) and a newly discovered JaichMaa 'ja'ag vent field (Fig. 1; Table 1). Sea  
541 anemones were collected by ROV manipulator or suction sampler (Supplemental video,  
542 currently available at <https://doi.org/10.5061/dryad.mkkwh70wt>) and preserved  
543 shipboard as described below in each analysis section. Targeted water samples (2 L) were  
544 collected via Niskin bottle mounted on ROV *SuBastian*.

545

546 ***Material examined for redescription of *Ostiactis pearseae****

547 SIO-BIC Co3060 [GC18-0004] (S0193-R2): Specimens: 2; Details: Fixative 4%  
548 paraformaldehyde; Preservative: 50% EtOH; Matterhorn, Auka Vent Field, Pescadero  
549 Basin, Mexico (23.95404°N, 108.86296°W); 3655 m; 14-Nov-2018. SIO-BIC Co3061  
550 [GC18-0005] (S0193-A2): Specimens: 1; 10% formalin, preserved 50% EtOH;  
551 Matterhorn to Diane's Vent, Auka Vent Field, Pescadero Basin, Mexico (23.95472°N, -  
552 108.86233°W); 3655 m; 14-Nov-2018. SIO-BIC Co3067 [GC18-0028] (S0194-S2):  
553 Specimens: 2; fixed: 10% formalin; 50% EtOH; Z Mound, Auka Vent Field, Pescadero  
554 Basin, Mexico (23.95666°N, -108.86171°W); 3670 m; 15-Nov-2018. Material studied  
555 has been deposited in the Benthic Invertebrate Collection of Scripps Institution of  
556 Oceanography (University of California San Diego) and the Invertebrate Division  
557 collection of the American Museum of Natural History (AMNH) in New York.

558

559 Additional specimens examined in this study include Kadosactinidae 'sp.B' (SIO-BIC  
560 Co3065 [GC18-0012] (S0193-S4) and the unidentified zoanthid (SIO-BIC Co3066  
561 [GC18-0025] (S0194-S1).

562

563 ***Carbon, nitrogen, and sulfur isotope analysis***

564 Tissue samples were dissected at sea, rinsed in milli-Q water, and frozen at -20°C until  
565 thawed, washed with milli-Q water, and dried for 48 h at 60°C. Carbon and nitrogen  
566 isotope determinations of anemone tissues were made via isotope ratio mass  
567 spectrometry. Samples (0.2-0.8 mg dry weight) were loaded in tin boats and analyzed for  
568 total organic carbon (TOC) and total nitrogen (TN) abundances and  $\delta^{13}\text{C}_{\text{org}}$  and  $\delta^{15}\text{N}$   
569 using a Flash 2000 Elemental Analyzer (Thermo Fisher Scientific) interfaced to a Delta  
570 V Plus IRMS (Thermo Fisher Scientific) at Washington University, Missouri, USA.  
571 Samples were interspersed with several replicates of both in-house standards and  
572 international reference materials, including: IAEA-CH-6, IAEA-CH-3, IAEA-NO3,



573 USGS-40, and USGS-41. TOC and TN abundances were quantified by integrating peak  
574 areas against those produced by in-house standards across a range of masses. The isotopic  
575 values are expressed in permil (‰) relative to international standards V-PDB (Vienna  
576 Pee Dee Belemnite) and Air for carbon and nitrogen, respectively. The long-term  
577 standard deviation is 0.2‰ for  $\delta^{13}\text{C}_{\text{org}}$  and 0.3‰ for  $\delta^{15}\text{N}$ . Sulfur isotope analyses were  
578 performed by combusting ~2-5 mg (dry weight) of tissue using a Costech ECS 4010  
579 elemental analyser coupled to a Thermo Fisher Scientific Delta V Plus mass  
580 spectrometer. Sulfur isotope values are expressed in standard delta notation ( $\delta^{34}\text{S}$ ) in  
581 permil (‰) as a deviation from the Vienna Canyon Diablo Troilite (VCDT) standard. The  
582 long-term standard deviation is 0.3‰ for  $\delta^{34}\text{S}$  is 0.3‰ based on in-house and  
583 international standards, including NBS-127 and IAEA-S1.

584

#### 585 ***DNA extraction***

586 Specimens for molecular analysis (Table 1) were preserved immediately upon collection  
587 in ~90% ethanol and stored at 4°C. Total genomic DNA was extracted from tissues using  
588 the Qiagen DNeasy kit (Qiagen, Valencia, CA, USA) according to the manufacturer's  
589 instructions. 2L water samples were filtered onto a 0.22  $\mu\text{m}$  Sterivex-GP  
590 polyethersulfone filter (Millipore-Sigma, St. Louis, MO, USA) and frozen at -80°C until  
591 DNA analysis. DNA extraction from Sterivex PES filters was also performed using the  
592 Qiagen DNeasy kit, according to the manufacturer's instructions, with the exception of  
593 the first step where 2 ml of ATL lysis buffer was added to the Sterivex filter, via luer lock  
594 and syringe, and rotated at 56°C for 12 hours. This solution was recovered from the filter,  
595 also via luer lock and syringe, and processed as usual.

596

#### 597 ***Molecular Analysis of the microbial community***

598 A 1000-bp region of the gene coding for *napA* (periplasmic nitrate reductase) was  
599 amplified directly from *Ostiactis* tissues using the primers V16F (5'-GCNCCNTG-  
600 YMGNTTYTG YGG-3') and V17R (5'-RTGYTGRTTRAANCCCATNGTCCA-3;  
601 Flanagan et al. 1999), while a 408 bp fragment of the *aprA* gene (subunit of particulate  
602 methane monooxygenase enzyme) was generated using primers, *aps1F* (5-  
603 TGGCAGATCATGATY MAYGG-3) and *aps4R* (5-GCGCCAACYGGRCRTA-3,  
604 described in Blazejak et al. 2006). A 1465-bp fragment of the 16S rRNA gene was  
605 amplified using the primers 27F and 1492R. Annealing conditions of 50°C, 50°C and  
606 54°C were used for *napA*, *aprA*, and 16SrRNA, respectively. Otherwise, all thermal  
607 protocols included the following steps: an initial 5 min denaturation at 94°C, then 1 min  
608 at 94°C, 1 min annealing step, and 1 min at 72°C, for 25 cycles, and a final 5 min  
609 extension at 72°C. Amplification products were sequenced directly using Sanger  
610 sequencing, via Laragen Inc., and submitted to GenBank (accession numbers  
611 XXXXXXXX – TBD; currently available at <https://doi.org/10.5061/dryad.mkkwh70wt>).  
612 Close environmental and cultured relatives were chosen using top hits based on BLAST

613 (www.ncbi.nlm.nih.gov).

614 The V4-V5 region of the 16S rRNA gene was amplified using bacterial primers with  
615 Illumina (San Diego, CA, USA) adapters on the 5' end 515F (5'-TCGTCGGC-  
616 AGCGTCAGATGTGTATAAGAGACAGGTGCCAGCMGCCGCGGTAA-3') and  
617 806R (5'-GTCTCGTGGGCTCGGAGATGTGTATAAGAGACAGGGACTACHV-  
618 GGGTWTCTAAT-3') (Caporaso et al. 2011). The PCR reaction mix was set up in  
619 duplicate for each sample with Q5 Hot Start High-Fidelity 2x Master Mix (New England  
620 Biolabs, Ipswich, MA, USA) and annealing conditions of 54°C for 25 cycles. Duplicate  
621 PCR samples were then pooled and 2.5 µL of each product was barcoded with Illumina  
622 NexteraXT index 2 Primers that include unique 8-bp barcodes (P5 5'-  
623 AATGATACGGCGACCACCGAG-ATCTACAC-XXXXXXXX-  
624 TCGTCGGCAGCGTC-3' and P7 5'-CAAGCAGAA-GACGGCATAACGAGAT-  
625 XXXXXXXX-GTCTCGTGGGCTCGG-3'). Secondary amplification with barcoded  
626 primers used conditions of 66°C annealing temperature and 10 cycles. Products were  
627 purified using Millipore-Sigma (St. Louis, MO, USA) MultiScreen Plate MSNU03010  
628 with a vacuum manifold and quantified using Thermo-Fisher Scientific (Waltham, MA,  
629 USA) QuantIT PicoGreen dsDNA Assay Kit P11496 on the BioRad CFX96 Touch Real-  
630 Time PCR Detection System. Barcoded samples were combined in equimolar amounts  
631 into single tube and purified with Qiagen PCR Purification Kit 28104 before submission  
632 to Laragen (Culver City, CA, USA) for 2 x 250bp paired end analysis on the Illumina  
633 MiSeq platform with PhiX addition of 15-20%.

634

635 MiSeq 16S rRNA sequence data was processed in Quantitative Insights Into Microbial  
636 Ecology (v1.8.0). Raw sequence pairs were joined and quality-trimmed using the default  
637 parameters in QIIME. Sequences were clustered into *de novo* operational taxonomic units  
638 (OTUs) with 99% similarity using UCLUST open reference clustering protocol, and then,  
639 the most abundant sequence was chosen as representative for each *de novo* OTU.

640 Taxonomic identification for each representative sequence was assigned using the Silva-  
641 119 database, clustered at 99% similarity. A threshold filter was used to remove any OTU  
642 that occurred below 0.01% in the combined samples dataset. Analyses are based on Bray-  
643 Curtis distances of fourth-root transformed data, which minimizes errors in the ordination  
644 due to PCR bias, while not sacrificing genuine differences between samples.

645 Quantification and statistical analyses are described in the Results sections and figure  
646 legends. Comparisons were performed using ANOVA and statistical significance was  
647 declared at  $P < 0.05$ . Statistical analyses of beta diversity (e.g. ANOSIM) were performed  
648 with Primer E. The raw and processed Illumina 16S rRNA sequence data, as well as  
649 representative sequences, are available in DataFile S1 on the Dryad Digital Repository  
650 (<https://doi.org/10.5061/dryad.mkkwh70wt>).

651

652

653 ***Molecular Analysis of the anemone host Ostiactis pearseae***

654 Phylogenetic relationships were determined via sequencing of three mitochondrial  
655 markers, the 12S rRNA, 16S rRNA, and cytochrome oxidase III genes, and the partial  
656 nuclear 18S rRNA gene. An 862-bp product of the 12S rRNA gene was amplified via  
657 primers ANTMT12SF (5'-AGCCAC-ACTTTCCTGAAACAAGG-3') and  
658 ANTMT12SR (5'-GTTCCCYWYCYTYA-CYATGTTACGAC-3') according to Chen  
659 and Yu 2000. A 473-bp product of the 16S rRNA gene was amplified via primers  
660 ANEM16SA (5'-CACTGACCGTGATAATG-TAGCGT-3') and ANEM16SB (5'-  
661 CCCCATGGTAGCTTTTATTCG-3') according to Geller and Walton 2001. Finally, a  
662 721-bp product of the cytochrome oxidase III (COIII) gene was amplified via primers  
663 COIIIF (5'-CATTAGTTGATCCTAGGCCTTGACC-3') and COIIIR (5'-  
664 CAAACCACATCTA-CAAATGCCAATATC-3') according to Geller and Walton  
665 2001. Finally, a 502-bp product of the 18S rRNA gene was amplified via primers 18S-3F  
666 (5'- GTTCGATTC-CGGAGAGGGA-3') and 18S-5R (5'-CTTGGCAAATGCTITCGC-  
667 3') according to Giribet et al. 1996. Annealing conditions of 55°C, 51.5°C, 51°C and  
668 54°C were used for 12SrRNA, 16SrRNA, COIII, and 18S rRNA, respectively.  
669 Otherwise, all thermal protocols included the following steps: an initial 5 min  
670 denaturation at 94°C, then 1 min at 94°C, <sup>[1]</sup>1 min annealing step, and 1 min at 72°C, for  
671 30 cycles, and a final 5 min extension at 72°C. Amplification products were sequenced  
672 directly using Sanger sequencing, via Laragen Inc., and submitted to GenBank (accession  
673 numbers xxxxx-xxxxx TBD, currently available at  
674 <https://doi.org/10.5061/dryad.mkkwh70wt>).

675 Newly generated DNA sequences for *Ostiactis pearseae* (and those for morphotype  
676 identified as Kadosactinidae sp.B. in this contribution) were combined and analyzed with  
677 the dataset by Gusmão et al. (2019) for each of the four markers (Table S2). Sequences  
678 for each marker were separately aligned in MAFFT v.7 (Kato et al. 2013, 2017) using  
679 the following settings: Strategy, L-INS-I; Scoring matrix for nucleotide sequences,  
680 200PAM/k = 2; Gap open penalty, 1.53; Offset value, 0.05. Alignments for each marker  
681 were analyzed separately and as a concatenated dataset (alignments available from the  
682 Dryad Digital Repository at <https://doi.org/10.5061/dryad.mkkwh70wt>). For each gene  
683 region, the best model of nucleotide substitution was chosen using the Akaike  
684 information criterion (AIC) on jModeltest2 (Guindon and Gascuel, 2003; Darriba et al.  
685 2012) implemented on the CIPRES Portal (Miller et al., 2010). Maximum Likelihood  
686 (ML) analyses were performed using RAxML-NG v0.6.0 (Kozlov et al. 2018), using the  
687 appropriate model of nucleotide substitution for each gene partition (12S: GTR+I+G;  
688 16S: TVM+G; COIII: TPM3uf+I+G; 18S: TIM2+I+G; 28S: GTR+I+G) in the combined  
689 alignment. The Majority Rule Criterion was used to assess clade support allowing  
690 bootstrapping to halt automatically (-autoMRE). All analyses were run with gaps treated  
691 as missing data.

692

693 ***Morphology and cnidae analysis of the anemone host *Ostiactis pearseae****

694 Specimens were examined whole and dissected. Histological sections 5-10  $\mu\text{m}$  thick were  
695 made from different body regions of two specimens using standard paraffin techniques  
696 and stained with Heidenhain Azan stain (Presnell and Schreibman, 1997). The  
697 distribution and size ranges of cnidae in the tissues was analyzed from six specimens  
698 using light DIC microscopy (1000x magnification, oil immersion). Twenty non-fired  
699 capsules of each cnida type (when possible) were photographed and measured at random.  
700 Cnidae size distribution offers information on the variability in capsule size for each type  
701 of nematocyst. We follow a nematocyst terminology that combines the classification of  
702 Weill (1934) modified by Carlgren (1940), thus differentiating ‘basitrichs’ from ‘b-  
703 mastigophores’ with that of Schmidt (1969, 1972) which captures the underlying  
704 variation seen in ‘rhabdoids’ (see Gusmão et al., 2018 for more details). We include  
705 photographs of each type of nematocyst for reliable comparison across terminologies and  
706 taxa (see Fautin, 1988). Higher-level classification for Actiniaria follows Rodríguez et al.  
707 (2014).

708

709 ***Hybridization Chain Reaction-Fluorescent in-situ hybridization***

710 Specimens for fluorescence in situ hybridization (FISH) microscopy were initially  
711 preserved in 4% sucrose-buffered paraformaldehyde (PFA) and kept at 4°C for 24-48  
712 hours. These PFA-preserved specimens were then rinsed with 2× PBS, transferred to  
713 70% ethanol, and stored at -20°C. Tissues were dissected and embedded in Steedman’s  
714 wax (1 part cetyl alcohol: 9 parts polyethylene glycol (400) distearate, mixed at 60°C).  
715 An ethanol: wax gradient of 3:1, 2:1 and 1:1, and 100% wax, was used to embed the  
716 samples (1 h each treatment at 37°C). Embedded samples were sectioned at ~3  $\mu\text{m}$   
717 thickness using a Leica RM2125 microtome and placed on Superfrost Plus slides.  
718 The protocol and all solutions used for HCR-FISH were as specified by Molecular  
719 Technologies, Inc., and closely followed Choi et al. 2014. Sections were dewaxed in  
720 three 100% ethanol rinses, allowed to dry, and equilibrated in hybridization buffer  
721 (Molecular Technologies; 30% formamide, 5× sodium chloride, sodium citrate (SSC =  
722 750 mM NaCl, 75 mM sodium citrate), 9 mM citric acid (pH 6.0), 0.1% Tween 20, 50  
723  $\mu\text{g}/\text{mL}$  heparin, 1× Denhardt’s solution, 10% dextran sulfate), for 20 min at 37°C. Excess  
724 buffer was removed and sections were hybridized overnight in a humidification chamber  
725 at 37°C in hybridization buffer, to which was added a final concentration of 5 nM of an  
726 unlabeled DNA probe, designed to be an exact match to the *Ostiactis pearseae* SUP05  
727 16S rRNA phylotype (Anem-SUP05, 5’-ACCATACTCTAGTTTGCCAG-3’), based on  
728 the probe, ‘BangT-642’, specific for the thiotrophic SUP05 symbiont in *Bathymodiolus*  
729 mussels (Duperron et al. 2005). A general bacterial probe set (Eub338-I-III) was also  
730 used as a positive control. These probes contained a specific sequence initiator tag  
731 (termed B1 and B3) that triggered the oligomerization of pairs of fluorescently-labeled  
732 DNA hairpins (i.e. the amplification step; Choi et al. 2014). The B1 initiator tag + linker

733 (5'-GAGGAGGGCAGCAAACGG-GAAGAGTCTTCCTTTACG-ATATT-3') was  
734 added to the 5' end of the Anem-SUP05 probe. The B3 initiator tag + linker (5'-  
735 GTCCCTGCCTCTATATCTCCACTCAACTTT-AACCCG-ATATT-3') was added to  
736 the 5' end of each of three Eub338 probes I-III and to the Anem-SUP05 probe. In this  
737 case, tag B1 was paired with Alexa647-labelled hairpins, and tag B3 was paired with  
738 Alexa488-labelled hairpins.

739  
740 Excess probe was removed by sequentially washing the slides for 15 min at 37°C in  
741 probe wash buffer (Molecular Technologies; 30% formamide, 5× SSC, 9 mM citric acid  
742 (pH 6.0), 0.1% Tween 20, 50 µg/mL heparin) to which 5× SSCT (750 mM NaCl, 75 mM  
743 sodium citrate, 0.1% Tween 20, pH 7) had been added to final concentrations (vol/vol) of  
744 25%, 50%, and then 75%. This wash sequence was followed by two 15-min washes in  
745 100% 5× SSCT at 37°C. Before amplification, 6 pmol of each hairpin, per reaction, was  
746 'snap cooled' by heating to 95°C for 90 s, followed by 25°C for 30 min, in a  
747 thermocycler in separate PCR tubes. During this time, sections were equilibrated with  
748 amplification buffer (Molecular Technologies; 5× SSC, 0.1% Tween 20, 10% dextran  
749 sulfate) at room temperature for 30 min. For amplification, each 'snap-cooled' hairpin in  
750 a pair was added to 100 µl amplification buffer (for a final hairpin concentration of 60  
751 nM for each amplifier hairpin), and then sections were incubated overnight (~18 h) at  
752 room temperature on a rocking platform protected from light. To remove unbound  
753 hairpin sequences, sections were washed twice in 5× SSCT for 15 min at room  
754 temperature, followed by two 30-min washes in 5× SSCT. Sections were rinsed with  
755 distilled water and counterstained with 4'6'-diamidino-2-phenylindole (DAPI, 5 mg/mL)  
756 for 1 min, rinsed again and mounted in Citifluor. Tissues were examined by  
757 epifluorescence microscopy using either a Nikon E80i epifluorescence microscope with a  
758 Nikon DS-Qi1Mc high-sensitivity monochrome digital camera or a Zeiss Elyra  
759 microscope with an ANDOR-iXon EMCCD camera.

760

### 761 *Transmission electron microscopy*

762 Specimens for TEM and semi-thin sectioning were fixed in PFA and preserved in 50%  
763 EtOH. Before embedding, specimens were rehydrated, post-fixed with 1% OsO<sub>4</sub> and  
764 subsequently dehydrated again in an ascending acetone series and embedded in araldite. 1  
765 µm semi-thin sections were sectioned using a "Diatome Histo Jumbo" diamond knife on  
766 a Leica Ultracut S ultramicrotome and stained with toluidine blue (1% toluidine, 1%  
767 sodium-tetraborate and 20% saccharose). Coverslips were mounted with araldite and  
768 sections were imaged with an Olympus microscope (BX-51) equipped with the dot.slide  
769 system (2.2 Olympus, Hamburg). Silver interference-colored sections (70 – 75 nm) were  
770 prepared using a "Diatome Ultra 45°" diamond knife. The sections were placed on  
771 Formvar-covered, single-slot copper grids and stained with 2% uranyl acetate and lead  
772 citrate in an automated TEM stainer (QG-3100, Boeckeler Instruments). Ultra-thin

773 sections were examined using a Zeiss EM10 transmission electron microscope with  
774 digital imaging plates (DITABIS Digital Biomedical Imaging Systems, Germany).

775

776

## 777 **Declarations**

778

### 779 **Ethics approval and consent to participate**

780 Not applicable

781

### 782 **Consent for publication**

783 Not applicable

784

### 785 **Availability of Data and Materials**

786 Longer partial length 16S rRNA and ITS sequences are available from GenBank under  
787 accession numbers XXXXXX-XXXXXX (TBD). The raw Illumina barcode sequence  
788 data and QIIME processed data are available in DataFile S1 from the Dryad Digital  
789 Repository (<https://doi.org/10.5061/dryad.mkkwh70wt>), along with representative  
790 sequences for the SUP05 OTUs. Alignments for the anemone 12S rRNA, 16S rRNA, 18S  
791 rRNA, and COIII for both *Ostiactis pearseae* and Kadosactinidae ‘sp.B’, used to generate  
792 Figure 3, are also available at <https://doi.org/10.5061/dryad.mkkwh70wt>. Animal images  
793 and specimens were vouchered for long-term archiving into the Benthic Invertebrate  
794 Collection at Scripps Institution of Oceanography ([sioapps.ucsd.edu/collections/bi/](http://sioapps.ucsd.edu/collections/bi/)).

795

### 796 **Competing interests - TBD**

797 The authors declare that they have no competing interests.

798

### 799 **Funding**

800 Support for SKG and CM was provided by a Faculty Enrichment Grant and the  
801 Undergraduate Research Center, respectively, through Occidental College. Support for  
802 ET was provided, in part, by a post-doctoral fellowship from the German Research  
803 Foundation (DFG TI 973/1-1). The research expedition FK181031 was made possible via  
804 support from the Schmidt Ocean Institute.

805

### 806 **Authors’ Contributions**

807 S.K.G. conducted DNA analysis, including 16S rRNA barcoding, host gene sequencing,  
808 and fluorescent microscope analyses, analyzed experimental data, wrote the manuscript  
809 with input from coauthors, and participated in the research expedition. C.M. conducted  
810 DNA analysis, including 16S rRNA barcoding. E.T. performed electron microscopy  
811 analyses and participated in the research expedition. D.F. performed the isotope analyses  
812 and reviewed the paper. G.W.R. interpreted the electron microscopy analyses, advised on  
813 the species identification, and participated in the research expedition. L.G. conducted  
814 phylogenetic analysis and advised on host identification. E.R. conducted host anemone

815 analyses for species identification, including morphology, and wrote the manuscript. All  
816 authors contributed to data interpretation and editing of the paper.

817

### 818 **Acknowledgements**

819 We thank the captain and crew of the R/V *Falkor*, ROV *SuBastian* pilots and technicians,  
820 as well as scientific participants of FK181031, chief scientists R. Zierenberg, D. Caress,  
821 and V. Orphan, as well as J. Paduan (MBARI) for Figure 1 maps and S. Connon for  
822 assistance with microbial community analysis.

823 **References**

824

825 Blazejak A, Kuever J, Erséus C, Amann R, Dubilier N. Phylogeny of 16S rRNA, ribulose 1, 5-  
826 bisphosphate carboxylase/oxygenase, and adenosine 5'-phosphosulfate reductase genes from  
827 gamma- and alphaproteobacterial symbionts in gutless marine worms (Oligochaeta) from  
828 Bermuda and the Bahamas. *Appl. Environ. Microbiol.*. 2006 Aug 1;72(8):5527-36.

829

830 Breedy O, Rouse GW, Stabbins A, Cortes J, Cordes EE. New records of *Swiftia* (Cnidaria,  
831 Anthozoa, Octocorallia) from off the Pacific Costa Rican margin, including a new species from  
832 methane seeps. *Zootaxa*. 2019 Sep;4671(3):407-419.

833

834 Brown CT, Hug LA, Thomas BC, Sharon I, Castelle CJ, Singh A, Wilkins MJ, Wrighton KC,  
835 Williams KH, Banfield JF. Unusual biology across a group comprising more than 15% of domain  
836 Bacteria. *Nature*. 2015 Jul;523(7559):208-11.

837

838 Canfield, D.E., 2004. The evolution of the Earth surface sulfur reservoir. *American Journal of*  
839 *Science*, 304(10): 839-861.

840

841 Caporaso JG, Lauber CL, Walters WA, Berg-Lyons D, Lozupone CA, Turnbaugh PJ, Fierer N,  
842 Knight R. Global patterns of 16S rRNA diversity at a depth of millions of sequences per sample.  
843 *Proceedings of the national academy of sciences*. 2011 Mar 15;108(Supplement 1):4516-22.

844

845 Caress, D., Troni, G., Clague, D., Paduan, J., Martin, J., Thomas, H., Conlin, D., Martin, E,  
846 Meneses-Quiroz, E., Nieves-Cardoso, C., & Santa Rosa del Rio, M. 2015. Detection of active  
847 hydrothermal vent fields in the Pescadero Basin and on the Alarcón Rise using AUV multibeam  
848 and CTD data, Abstract OS23C-2027 presented at the AGU Fall Meeting, San Francisco, CA,  
849 December 14-18.

850

851 Carlgren, O. 1940. A contribution to the knowledge of the structure and distribution of the cnidae  
in the Anthozoa. *Kungliga Fysiografiska Sällskapets Handlingar* 51: 1–62.

852

853 Chambers LA, Trudinger PA. Microbiological fractionation of stable sulfur isotopes: a review  
854 and critique. *Geomicrobiology Journal*. 1979 Jan 1;1(3):249-93.

855

856 Chen CA, Yu JK. Universal primers for amplification of mitochondrial small subunit ribosomal  
857 RNA-encoding gene in scleractinian corals. *Marine Biotechnology*. 2000 Mar 1;2(2):146-53.

858

859 Choi HM, Beck VA, Pierce NA. Next-generation in situ hybridization chain reaction: higher gain,  
860 lower cost, greater durability. *ACS nano*. 2014 May 27;8(5):4284-94.

861

862 Daly M, Gusmão L. The first sea anemone (Cnidaria: Anthozoa: Actiniaria) from a whale fall.  
863 *Journal of Natural History*. 2007 Feb 16;41(1-4):1-1.

864

865 Daly M, Chaudhuri A, Gusmão L, Rodríguez E. Phylogenetic relationships among sea anemones  
866 (Cnidaria: Anthozoa: Actiniaria). *Molecular phylogenetics and evolution*. 2008 Jul 1;48(1):292-  
867 301.

868

869 Darriba, D., G.L. Taboada, R. Djalilo, D. Posada. 2012. jModeltest 2: more models, new heuristics  
and parallel computing. *Nature Methods* 9: 772.

870

Doumenc D, Van-Praet M. 1988. Actinies abyssales d'un site hydrothermal du Pacifique



- 871 oriental. *Oceanologica Acta*, special 8:61-8.
- 872 Dubilier N, Bergin C, Lott C. Symbiotic diversity in marine animals: the art of harnessing  
873 chemosynthesis. *Nature Reviews Microbiology*. 2008 Oct;6(10):725-40.  
874
- 875 Duperron S, Nadalig T, Caprais JC, Sibuet M, Fiala-Médioni A, Amann R, Dubilier N. Dual  
876 symbiosis in a *Bathymodiulus* sp. mussel from a methane seep on the Gabon continental margin  
877 (Southeast Atlantic): 16S rRNA phylogeny and distribution of the symbionts in gills. *Appl.*  
878 *Environ. Microbiol.*. 2005 Apr 1;71(4):1694-700.  
879
- 880 Fautin, D.G. 1988. The importance of nematocysts to actiniarian taxonomy. *In* D.A. Hessinger  
881 and H.M. Lenhoff (editors), *The biology of nematocysts: 487–500*. New York: Academic Press.  
882
- 883 Fautin DG, Mariscal RN. *Cnidaria: anthozoa*. New York: Wiley-Liss; 1991.  
884
- 885 Fisher CR, Childress JJ, Minnich E. Autotrophic carbon fixation by the chemoautotrophic  
886 symbionts of *Riftia pachyptila*. *The Biological Bulletin*. 1989 Dec;177(3):372-85.  
887
- 888 Flanagan DA, Gregory LG, Carter JP, Karakas-Sen A, Richardson DJ, Spiro S. Detection of  
889 genes for periplasmic nitrate reductase in nitrate respiring bacteria and in community DNA.  
890 *FEMS Microbiology Letters*. 1999 Aug 1;177(2):263-70.  
891
- 892 Fujiwara Y, Takai K, Uematsu K, Tsuchida S, Hunt JC, Hashimoto J. Phylogenetic  
893 characterization of endosymbionts in three hydrothermal vent mussels: influence on host  
894 distributions. *Marine Ecology Progress Series*. 2000 Dec 8;208:147-55.  
895
- 896 Geller JB, Walton ED. Breaking up and getting together: evolution of symbiosis and cloning by  
897 fission in sea anemones (genus *Anthopleura*). *Evolution*. 2001 Sep;55(9):1781-94.  
898
- 899 Giribet G, Carranza S, Baguna J, Riutort M, Ribera C. First molecular evidence for the existence  
900 of a Tardigrada+ Arthropoda clade. *Molecular biology and evolution*. 1996 Jan 1;13(1):76-84.  
901
- 902 Glaubitz S, Kießlich K, Meeske C, Labrenz M, Jürgens K. SUP05 dominates the  
903 gammaproteobacterial sulfur oxidizer assemblages in pelagic redoxclines of the central Baltic and  
904 Black Seas. *Appl. Environ. Microbiol.*. 2013 Apr 15;79(8):2767-76.  
905
- 906 Goffredi SK, Childress JJ, Desaulniers NT, Lallier FJ. Sulfide acquisition by the vent worm *Riftia*  
907 *pachyptila* appears to be via uptake of HS<sup>-</sup>, rather than H<sub>2</sub>S. *Journal of Experimental Biology*.  
908 1997 Oct 1;200(20):2609-16.  
909
- 910 Goffredi SK, Johnson S, Tunnicliffe V, Caress D, Clague D, Escobar E, Lundsten L, Paduan JB,  
911 Rouse G, Salcedo DL, Soto LA. Hydrothermal vent fields discovered in the southern Gulf of  
912 California clarify role of habitat in augmenting regional diversity. *Proceedings of the Royal*  
913 *Society B: Biological Sciences*. 2017 Jul 26;284(1859):20170817.  
914
- 915 Goffredi SK, Tilic E, Mullin SW, Dawson KS, Keller A, Lee RW, Wu F, Levin LA, Rouse GW,  
916 Cordes EE, Orphan VJ. Methanotrophic bacterial symbionts fuel dense populations of deep-sea  
917 feather duster worms (Sabellida, Annelida) and extend the spatial influence of methane seepage.  
918 *Science Advances*. 2020 Apr 1;6(14):eaay8562.  
919

- 920 Grajales A, Rodríguez E Elucidating diversity within the Aiptasiidae, a widespread cnidarian-  
921 dinoflagellate model system (Cnidaria: Anthozoa: Actiniaria: Metridioidea). *Molecular*  
922 *Phylogenetics and Evolution*. 2016;94(A):252-263.  
923
- 924 Gruber-Vodicka HR, Leisch N, Kleiner M, Hinzke T, Liebeke M, McFall-Ngai M, Hadfield MG,  
925 Dubilier N. Two intracellular and cell type-specific bacterial symbionts in the placozoan  
926 *Trichoplax H2*. *Nature microbiology*. 2019 Sep;4(9):1465-74.  
927
- 928 Guindon, S. & Gascuel, O. A simple, fast, and accurate algorithm to estimate large phylogenies  
929 by maximum likelihood. *Syst. Biol.* **52**, 696–704 (2003).
- 930 Guindon, S, J.F. Dufayard, V. Lefort, M. Anisimova, W. Hordijk, and O. Gascuel. 2010. New  
931 algorithms and methods to estimate maximum-likelihood phylogenies: assessing the performance  
932 of PhyML 3.0. *Systematic Biology* 59: 307–321.  
933
- 934 Gusmão, L.C., A. Grajales, and E. Rodríguez. 2018. Sea Anemones through X-rays:  
935 Visualization of Two Species of *Diadumene* (Cnidaria, Actiniaria) Using Micro-CT. *American*  
936 *Museum Novitates* 3907: 1–45.  
937
- 938 Gusmão LC, Rodríguez E, Daly M (2019) Description of *Calliactis tigris* sp. nov.: reconciling  
939 taxonomy and phylogeny in hermit-crab symbiotic anemones (Cnidaria: Actiniaria:  
940 Hormathiidae). *Organismal Diversity and Evolution*, 19(4): 567-583; doi.org/10.1007/s13127-  
941 019-00414-2.  
942
- 943 Harris JK, Kelley ST, Pace NR. New perspective on uncultured bacterial phylogenetic division  
944 OP11. *Appl. Environ. Microbiol.*. 2004 Feb 1;70(2):845-9.  
945
- 946 Hatch AS, Liew H, Hourdez S, Rouse GW. Hungry scale worms: Phylogenetics of  
947 *Peinaleopolynoe* (Polynoidae, Annelida), with four new species. *ZooKeys*. 2020 Dec 5;932:27.  
948
- 949 Heijs SK, Sinninghe Damsté JS, Forney LJ. Characterization of a deep-sea microbial mat from an  
950 active cold seep at the Milano mud volcano in the Eastern Mediterranean Sea. *FEMS*  
951 *microbiology ecology*. 2005 Sep 1;54(1):47-56.  
952
- 953 Ikuta T, Takaki Y, Nagai Y, Shimamura S, Tsuda M, Kawagucci S, Aoki Y, Inoue K, Teruya M,  
954 Satou K, Teruya K. Heterogeneous composition of key metabolic gene clusters in a vent mussel  
955 symbiont population. *The ISME journal*. 2016 Apr;10(4):990-1001.  
956
- 957 Jones AM, Berkelmans R, van Oppen MJ, Mieog JC, Sinclair W. A community change in the  
958 algal endosymbionts of a scleractinian coral following a natural bleaching event: field evidence of  
959 acclimatization. *Proceedings of the Royal Society B: Biological Sciences*. 2008 Jun  
960 22;275(1641):1359-65.  
961
- 962 Kantor RS, Wrighton KC, Handley KM, Sharon I, Hug LA, Castelle CJ, Thomas BC, Banfield  
963 JF. Small genomes and sparse metabolisms of sediment-associated bacteria from four candidate  
964 phyla. *MBio*. 2013 Nov 1;4(5):e00708-13.  
965
- 966 Kaplan, I.R., Emery, K.O., Rittenberg, S.C., 1963. The distribution and isotopic abundance of  
967 sulphur in recent marine sediments off southern California. *Geochim. et Cosmochim. Acta*, 27:  
968 297 - 331.  
969

- 970 Katoh, K., and D.M. Standley. 2013. MAFFT Multiple Sequence Alignment Software Version 7:  
971 Improvements in Performance and Usability. *Molecular Biology and Evolution* 30: 772–780.  
972
- 973 Katoh, K., J. Rozewicki, and K.D. Yamada. 2017. MAFFT online service: multiple sequence  
974 alignment, interactive sequence choice and visualization. *Brief in Bioinformatics*  
975 [doi:10.1093/bib/bbx108]  
976
- 977 Kim ES, Sakai H, Hashimoto J, Yanagisawa F, Ohta S. Sulfur isotopic ratios of hydrothermal  
978 vent-animals at Ogasawara Arc and Mid-Okinawa Trough-evidence for microbial origin of  
979 hydrogen sulfide at low-temperature submarine hydrothermal areas. *Geochemical journal*.  
980 1989;23(4):195-208.  
981
- 982 Kozlov, A.M., D. Darriba, T. Flouri, B. Morel, and A. Stamatakis. 2018. RAxML-NG: a fast  
983 scalable, and user-friendly tool for maximum likelihood phylogenetic inference. *Bioinformatics*  
984 btz305. [doi:10.1101/447110]  
985
- 986 Labrenz M, Jost G, Jürgens K. Distribution of abundant prokaryotic organisms in the water  
987 column of the central Baltic Sea with an oxic–anoxic interface. *Aquatic microbial ecology*. 2007  
988 Feb 2;46(2):177-90.  
989
- 990 LaJeunesse TC, Parkinson JE, Gabrielson PW, Jeong HJ, Reimer JD, Voolstra CR, Santos SR.  
991 Systematic revision of Symbiodiniaceae highlights the antiquity and diversity of coral  
992 endosymbionts. *Current Biology*. 2018 Aug 20;28(16):2570-80.  
993
- 994 Larson HK, Goffredi SK, Parra EL, Vargas O, Pinto-Tomas AA, McGlynn TP. Distribution and  
995 dietary regulation of an associated facultative Rhizobiales-related bacterium in the omnivorous  
996 giant tropical ant, *Paraponera clavata*. *Naturwissenschaften*. 2014 May 1;101(5):397-406.  
997
- 998 Lefort, V., J. Longueville, and O. Gascuel. 2017. SMS: Smart Model Selection in PhyML.  
999 *Molecular Biology and Evolution* 34: 24221–2424.  
1000
- 1001 Levin LA, Orphan VJ, Rouse GW, Rathburn AE, Ussler III W, Cook GS, Goffredi SK, Perez  
1002 EM, Waren A, Grupe BM, Chadwick G. A hydrothermal seep on the Costa Rica margin: middle  
1003 ground in a continuum of reducing ecosystems. *Proceedings of the Royal Society B: Biological*  
1004 *Sciences*. 2012 Jul 7;279(1738):2580-8.  
1005
- 1006 Marlow HQ, Martindale MQ. Embryonic development in two species of scleractinian coral  
1007 embryos: *Symbiodinium* localization and mode of gastrulation. *Evolution & development*. 2007  
1008 Jul;9(4):355-67.  
1009
- 1010 Marshall KT, Morris RM. Isolation of an aerobic sulfur oxidizer from the SUP05/Arctic96BD-19  
1011 clade. *The ISME journal*. 2013 Feb;7(2):452-5.  
1012
- 1013 McKiness ZP, Cavanaugh CM. The ubiquitous mussel: *Bathymodiolus aff. brevior* symbiosis at  
1014 the Central Indian Ridge hydrothermal vents. *Marine Ecology Progress Series*. 2005 Jun  
1015 23;295:183-90.  
1016
- 1017 McAuley PJ. Regulation of numbers of symbiotic *Chlorella* in digestive cells of green hydra.  
1018 *Endocyt. Cell Res*. 1985 Nov 1;2:179-90.  
1019

- 1020 McCowin MF, Feehery C, Rouse GW: Spanning the depths and depth-stratified: Three new species of  
1021 *Bathymodiolus* (Bivalvia, Mytilidae) at seeps along the Costa Rica margin. Deep-Sea Research Part I  
1022 2020. In press.  
1023  
1024 Mellas RE, McIlroy SE, Fitt WK, Coffroth MA. Variation in symbiont uptake in the early  
1025 ontogeny of the upside-down jellyfish, *Cassiopea* spp. Journal of experimental marine biology  
1026 and ecology. 2014 Oct 1;459:38-44.  
1027  
1028 Miller, M.A., W. Pfeiffer, and T. Schwartz. 2010. Creating the CIPRES Science Gateway for  
1029 inference of large phylogenetic trees. Proceedings of the Gateway Computing Environments  
1030 Workshop (GCE): 1–8.  
1031  
1032 Morse JW, Millero FJ, Cornwell JC, Rickard D. The chemistry of the hydrogen sulfide and iron  
1033 sulfide systems in natural waters. Earth-science reviews. 1987 Mar 1;24(1):1-42.  
1034  
1035 Neave MJ, Apprill A, Ferrier-Pagès C, Voolstra CR. Diversity and function of prevalent  
1036 symbiotic marine bacteria in the genus *Endozoicomonas*. Applied microbiology and  
1037 biotechnology. 2016 Oct 1;100(19):8315-24.  
1038  
1039 Nelson WC, Stegen JC. The reduced genomes of Parcubacteria (OD1) contain signatures of a  
1040 symbiotic lifestyle. Frontiers in microbiology. 2015 Jul 21;6:713.  
1041  
1042 Paduan JB, Zierenberg RA, Clague DA, Spelz RM, Caress DW, Troni G, Thomas H, Glessner J,  
1043 Lilley MD, Lorenson T, Lupton J. Discovery of hydrothermal vent fields on Alarcón Rise and in  
1044 Southern Pescadero Basin, Gulf of California. Geochemistry, Geophysics, Geosystems. 2018  
1045 Dec;19(12):4788-819.  
1046  
1047 Palincsar EE, Jones WR, Palincsar JS, Glogowski MA, Mastro JL. Bacterial aggregates within  
1048 the epidermis of the sea anemone *Aiptasia pallida*. The Biological Bulletin. 1989  
1049 Aug;177(1):130-40.  
1050  
1051 Paris G, Sessions AL, Subhas AV, Adkins JF. MC-ICP-MS measurement of  $\delta^{34}\text{S}$  and  $\Delta^{33}\text{S}$  in  
1052 small amounts of dissolved sulfate. Chemical Geology. 2013 May 8;345:50-61.  
1053  
1054 Petersen JM, Wentrup C, Verna C, Knittel K, Dubilier N. Origins and evolutionary flexibility of  
1055 chemosynthetic symbionts from deep-sea animals. The Biological Bulletin. 2012  
1056 Aug;223(1):123-37.  
1057  
1058 Preheim SP, Boucher Y, Wildschutte H, David LA, Veneziano D, Alm EJ, Polz MF.  
1059 Metapopulation structure of Vibrionaceae among coastal marine invertebrates. Environmental  
1060 Microbiology. 2011 Jan;13(1):265-75.  
1061  
1062 Presnell, J.K., and M.P. Schreiber. 1997. Humason's animal tissue techniques. Baltimore, MD:  
1063 Johns Hopkins University Press.  
1064  
1065 Rinke C, Schwientek P, Sczyrba A, Ivanova NN, Anderson IJ, Cheng JF, Darling A, Malfatti S,  
1066 Swan BK, Gies EA, Dodsworth JA. Insights into the phylogeny and coding potential of microbial  
1067 dark matter. Nature. 2013 Jul;499(7459):431-7.  
1068

- 1069 Robidart JC, Bench SR, Feldman RA, Novoradovsky A, Podell SB, Gaasterland T, Allen EE,  
1070 Felbeck H. Metabolic versatility of the *Riftia pachyptila* endosymbiont revealed through  
1071 metagenomics. *Environmental Microbiology*. 2008 Mar;10(3):727-37.  
1072
- 1073 Rodríguez, E., M. Barbeitos, M. Daly, L.C. Gusmão, and V. Häussermann. 2012. Toward a  
1074 natural classification: phylogeny of acontiate sea anemones (Cnidaria, Anthozoa, Actiniaria).  
1075 *Cladistics* 1: 1–18.  
1076
- 1077 Rodríguez, E., M.S. Barbeitos, M.R. Brugler, L.M. Crowley, A. Grajales, L. Gusmão, V.  
1078 Häussermann, A. Reft, and M. Daly. 2014. Hidden among sea anemones: first comprehensive  
1079 phylogenetic reconstruction of the order Actiniaria (Cnidaria: Anthozoa: Hexacorallia) reveals a  
1080 novel group of hexacorals. *PLoS ONE* 9: 1–15.  
1081
- 1082 Rogers AD, Tyler PA, Connelly DP, Copley JT, James R, Larter RD, Linse K, Mills RA,  
1083 Garabato AN, Pancost RD, Pearce DA. The discovery of new deep-sea hydrothermal vent  
1084 communities in the Southern Ocean and implications for biogeography. *PLoS Biol*. 2012 Jan  
1085 3;10(1):e1001234.  
1086
- 1087 Rouse GW, Wilson NG, Carvajal JI, Vrijenhoek RC. New deep-sea species of *Xenoturbella* and  
1088 the position of Xenacoelomorpha. *Nature*. 2016 Feb;530(7588):94-7.  
1089
- 1090 Sakai H, Des Marais DJ, Ueda A, Moore JG. Concentrations and isotope ratios of carbon,  
1091 nitrogen and sulfur in ocean-floor basalts. *Geochimica et Cosmochimica Acta*. 1984 Dec  
1092 1;48(12):2433-41.  
1093
- 1094 Salcedo DL, Soto LA, Paduan JB. Trophic structure of the macrofauna associated to deep-vents  
1095 of the southern Gulf of California: Pescadero Basin and Pescadero Transform Fault. *PLoS one*.  
1096 2019;14(11).  
1097
- 1098 Sanamyan NP, Sanamyan KE. 2007. Deep-water Actiniaria from East Pacific hydrothermal vents  
1099 and cold seeps. *Invertebrate Zoology* 4:83-102.  
1100
- 1101 Schlichter, D. The importance of dissolved organic compounds in sea water for the nutrition of  
1102 *Anemonia sulcata* Pennant (Coelenterata). *Proc. Eur. Mar. Biol. Symp.* 1975; 9: 395–405.  
1103
- 1104 Schlichter, D. Adaptation of cnidarians for integumentary absorption of dissolved organic  
1105 material. *Rev. Can. Biol.* 1980; 39: 259-282.  
1106
- 1107 Schmidt, H. 1969. Die Nesselkapseln der Aktinien und ihre differentialdiagnostische Bedeutung.  
1108 *Helgoländer Wissenschaftliche Meeresuntersuchungen* 19: 284–317.  
1109
- 1110 Schmidt, H. 1972. Die Nesselkapseln der Anthozoen und ihre Bedeutung für die phylogenetische  
1111 Systematik. *Helgoländer Wissenschaftliche Meeresuntersuchungen* 23: 422–458.  
1112
- 1113 Schuett C, Doepke H, Grathoff A, Gedde M. Bacterial aggregates in the tentacles of the sea  
1114 anemone *Metridium senile*. *Helgoland Marine Research*. 2007 Sep 1;61(3):211-6.  
1115
- 1116 Shah V, Zhao X, Lundeen RA, Ingalls AE, Nicastro D, Morris RM. Morphological Plasticity in a  
1117 Sulfur-Oxidizing Marine Bacterium from the SUP05 Clade Enhances Dark Carbon Fixation.  
1118 *mBio*. 2019 Jun 25;10(3):e00216-19.  
1119

- 1120 Sunamura M, Higashi Y, Miyako C, Ishibashi JI, Maruyama A. Two bacteria phylotypes are  
1121 predominant in the Suiyo Seamount hydrothermal plume. *Appl. Environ. Microbiol.*. 2004 Feb  
1122 1;70(2):1190-8.  
1123
- 1124 Tait E, Carman M, Sievert SM. Phylogenetic diversity of bacteria associated with ascidians in Eel  
1125 Pond (Woods Hole, Massachusetts, USA). *Journal of experimental marine biology and ecology*.  
1126 2007 Mar 26;342(1):138-46.  
1127
- 1128 Ulloa O, Canfield DE, DeLong EF, Letelier RM, Stewart FJ. Microbial oceanography of anoxic  
1129 oxygen minimum zones. *Proceedings of the National Academy of Sciences*. 2012 Oct  
1130 2;109(40):15996-6003.  
1131
- 1132 Van Dover CL, Fry B. Stable isotopic compositions of hydrothermal vent organisms. *Marine*  
1133 *Biology*. 1989 Aug 1;102(2):257-63.  
1134
- 1135 Van Dover CL, Fry B. Microorganisms as food resources at deep-sea hydrothermal vents.  
1136 *Limnology and Oceanography*. 1994 Jan;39(1):51-7.  
1137
- 1138 Vohsen SA, Gruber-Vodicka HR, Osman EO, Saxton MA, Joye SB, Dubilier N, Fisher CR,  
1139 Baums IB. Deep-sea corals near cold seeps associate with chemoautotrophic bacteria that are  
1140 related to the symbionts of cold seep and hydrothermal vent mussels. *bioRxiv*. 2020 Jan 1.  
1141
- 1142 Walsh DA, Zaikova E, Howes CG, Song YC, Wright JJ, Tringe SG, Tortell PD, Hallam SJ.  
1143 Metagenome of a versatile chemolithoautotroph from expanding oceanic dead zones. *Science*.  
1144 2009 Oct 23;326(5952):578-82.  
1145
- 1146 Weill, R. 1934. *Contribution à l'Étude des Cnidaires et de leurs Nématocystes*. Paris: Les Presses  
1147 Universitaires de France.
- 1148 Wrighton KC, Thomas BC, Sharon I, Miller CS, Castelle CJ, VerBerkmoes NC, Wilkins 475 MJ,  
1149 Hettich RL, Lipton MS, Williams KH, Long PE, Banfield JF. 2012. Fermentation, 476 hydrogen,  
1150 and sulfur metabolism in multiple uncultivated bacterial phyla. *Science*.;337:1661-5.  
1151
- 1152 Yamanaka T, Mizota C, Maki Y, Fujikura K, Chiba H. Sulfur isotope composition of soft tissues  
1153 of deep-sea mussels, *Bathymodiolus* spp., in Japanese waters. *Benthos Research*. 2000 Dec  
1154 31;55(2):63-8.  
1155
- 1156 Yamanaka T, Mizota C, Fujiwara Y, Chiba H, Hashimoto J, Gamo T, Okudaira T. Sulphur-  
1157 isotopic composition of the deep-sea mussel *Bathymodiolus marisindicus* from currently active  
1158 hydrothermal vents in the Indian Ocean. *Journal of the Marine Biological Association of the*  
1159 *United Kingdom*. 2003 Aug;83(4):841-8.  
1160
- 1161 Zelnio K, Rodríguez E, Daly M. 2009. Hexacorals (Anthozoa: Actiniaria, Zoanthidea) from  
1162 hydrothermal vents in the South-western Pacific. *Marine Biology Research* 5(6):547-57.

**Table 1:** Sample locations within the Pescadero Basin, Gulf of California, along with dive information, depth, and specimen descriptions for Anthozoa other than *Ostiactis pearseae*.

| <i>Ostiactis pearseae</i>    |                 |       |                                       |                |
|------------------------------|-----------------|-------|---------------------------------------|----------------|
| Auka vent field              | Dive #-Sample # | Depth | Lat                                   | Lon            |
| Matterhorn <sup>1</sup>      | S0193-R2        | -3655 | 23°57.24218 N                         | 108°51.77758 W |
| E. of Diane's vent           | S0193-A2        | -3655 | 23°57.28307 N                         | 108°51.73963 W |
| Z vent (top) <sup>1</sup>    | S0194-S2        | -3670 | 23°57.39937 N                         | 108°51.70276 W |
| S. of Z vent (small chimney) | S0200-R2w       | -3687 | 23°57.36546 N                         | 108°51.71477 W |
| JaichMaa 'ja'ag vent field   |                 |       |                                       |                |
| Abuelita <sup>1</sup>        | S0197-S2        | -3692 | 23°56.53971 N                         | 108°51.34850 W |
| Weey 'kual                   | S0199-S8        | -3674 | 23°56.42347 N                         | 108°51.35257 W |
| Water samples <sup>2</sup>   |                 |       |                                       |                |
| Auka vent field              | Dive #-Sample # | Depth | Lat                                   | Lon            |
| E. of Diane's vent           | S0193-N2        | -3642 | 23°57.29596 N                         | 108°51.77752 W |
| JaichMaa 'ja'ag vent field   |                 |       |                                       |                |
| Abuelita                     | S0197-N2        | -3693 | 23°56.53998 N                         | 108°51.35074 W |
| Weey 'kual                   | S0199-N1        | -3669 | 23°56.41838 N                         | 108°51.34473 W |
| Other Anthozoa <sup>3</sup>  |                 |       |                                       |                |
| Auka vent field              | Dive #-Sample # | Depth | Description                           |                |
| Matterhorn                   | S0193-S4        | -3655 | Kadosactinidae 'sp.B' Green tentacles |                |
| E. of Diane's vent           | S0193-R3        | -3655 | Unidentified zoanthid                 |                |
| Z vent (lower on structure)  | S0194-R1        | -3670 | Unidentified zoanthid                 |                |
| NW. of Z vent (diffuse flow) | S0194-R2        | -3687 | Unidentified zoanthid                 |                |
| NW. of Z vent (diffuse flow) | S0194-S1        | -3687 | Unidentified zoanthid                 |                |
| S. of Z vent (small chimney) | S0200-R2r       | -3692 | Kadosactinidae 'sp.B' Red tentacles   |                |

<sup>1</sup> anemones collected very near active *Oasisia* tubeworms

<sup>2</sup> collected via Niskin sampler aboard the ROV SuBastian

<sup>3</sup> collected in the same general venting structure as *O. pearseae*, geo-locations noted above

**Table 2.** Size ranges of the cnidae capsules of *Ostiactis pearseae* (Daly & Gusmão, 2007). N: total number of capsules measured. F: Frequency, +++ = very common, ++ = common, + = rather common, \* = sporadic.

| Categories                              | Range length<br>× width (µm) | Avg ± SD           | N   | S   | F    | Range length<br>× width (µm) <sup>3</sup> |
|-----------------------------------------|------------------------------|--------------------|-----|-----|------|-------------------------------------------|
| COLUMN <sup>1</sup>                     |                              |                    |     |     |      |                                           |
| Basitrichs                              | 17.2-26.0 x 2.6-4.4          | 21.7±2.3 x 3.4±0.3 | 122 | 6/6 | ++   | 13.1–22.5 x 1.9–3.0                       |
| Holotrichs                              | 16.9-24.7 x 4.8-8.6          | 21.5±2.0 x 6.4±0.8 | 67  | 4/6 | */++ | 16.6–27.0 x 3.5–5.5                       |
| <i>p</i> -mastigophores B1              | ----                         | -----              |     | 0/6 |      | 17.8–33.9 x 2.6–5.3                       |
| TENTACLES                               |                              |                    |     |     |      |                                           |
| Robust spirocysts                       | 15.9-41.9 x 4.2-8.8          | 26.0±6.1 x 5.7±1.0 | 85  | 5/5 | ++   | 16.3–35.5 x 2.1–5.8                       |
| Basitrichs                              | 15.2-33.2 x 2.3-4.3          | 23.3±4.0 x 3.5±0.5 | 113 | 5/5 | +++  | 16.2–29.8 x 2.2–4.6                       |
| Holotrichs                              | 15.6-28.5 x 4.0-9.3          | 23.3±2.7 x 7.1±1.0 | 79  | 5/5 | +    | 23.1–34.4 x 2.9–6.9                       |
| ACTINOPHARYNX                           |                              |                    |     |     |      |                                           |
| Basitrichs 1                            | 16.4-20.2 x 2.6-3.2          | 18.1±1.7 x 2.9±0.2 | 5   | 2/3 | *    | 16.8–26.3 x 2.0–3.3                       |
| Basitrichs 2                            | 23.7-34.0 x 3.3-4.6          | 27.9±2.8 x 4.0±0.4 | 20  | 2/3 | ++   | 25.6–44.5 x 3.0–4.3                       |
| <i>p</i> -mastigophores A <sup>2</sup>  | 23.3-38.1 x 4.7-6.9          | 30.7±3.5 x 5.7±0.5 | 53  | 3/3 | ++   | -----                                     |
| <i>p</i> -mastigophores B1 <sup>2</sup> | 14.5-19.5 x 4.0-5.2          | 17.8±1.7 x 4.5±0.4 | 13  | 3/3 | ++   | 22.0–37.0 x 3.9–6.2                       |
| FILAMENTS                               |                              |                    |     |     |      |                                           |
| Basitrichs                              | 15.3-23.3 x 2.5-3.5          | 18.5±1.6 x 3.0±0.2 | 50  | 4/4 | */+  | 14.1–22.5 x 1.8–2.9                       |
| <i>p</i> -mastigophores A <sup>2</sup>  | 26.5-37.8 x 4.8-6.7          | 32.8±2.2 x 5.7±0.5 | 49  | 4/4 | +    |                                           |
| <i>p</i> -mastigophores B1 <sup>2</sup> | 13.4-21.3 x 3.6-6.3          | 17.4±1.7 x 4.6±0.6 | 59  | 4/4 | +++  | 17.5–37.6 x 3.4–6.0                       |

<sup>1</sup>Two specimens with papillae in distal column (see Fig. 2); papillae with only basitrichs of similar sizes than those in the rest of the column (i.e. 17.0-21.6 x 2.7-3.7 µm).

<sup>2</sup>Categories pooled together as microbasic *p*-mastigophores in Daly & Gusmão (2007).

<sup>3</sup>Data from Daly & Gusmão (2007).



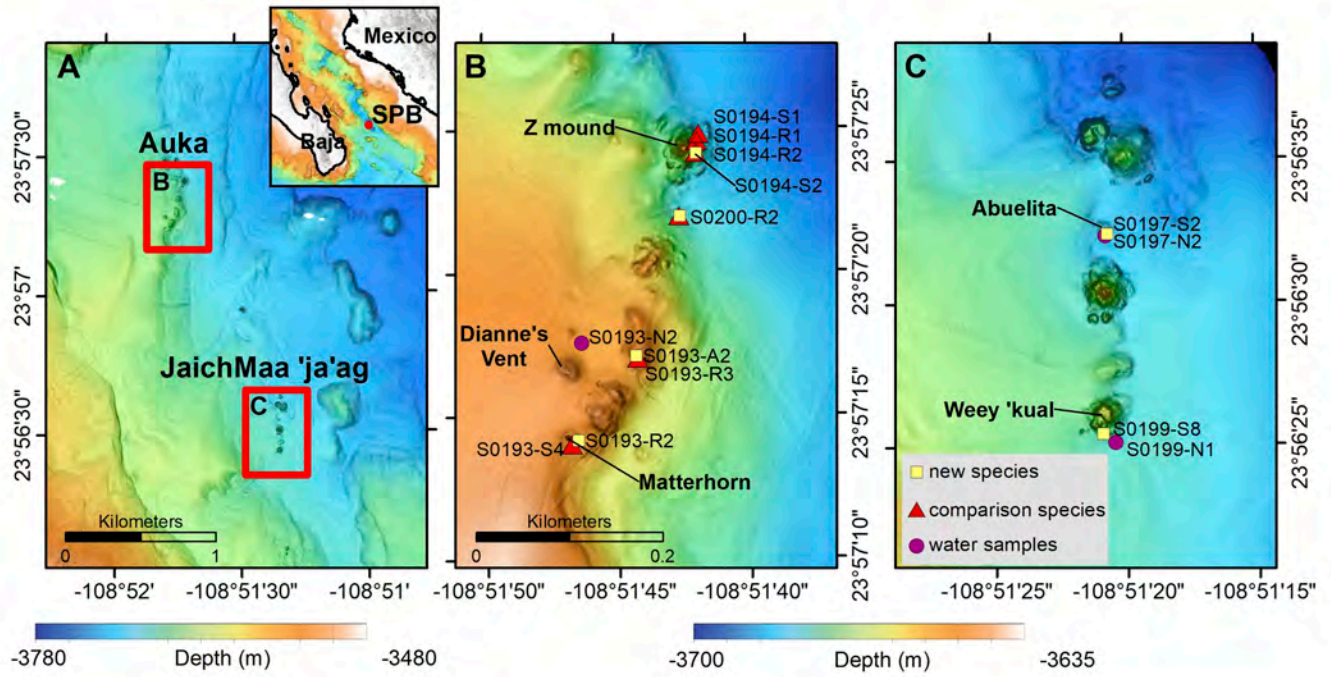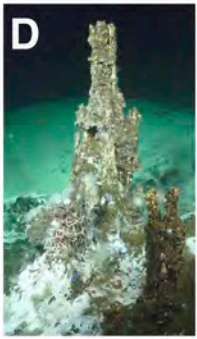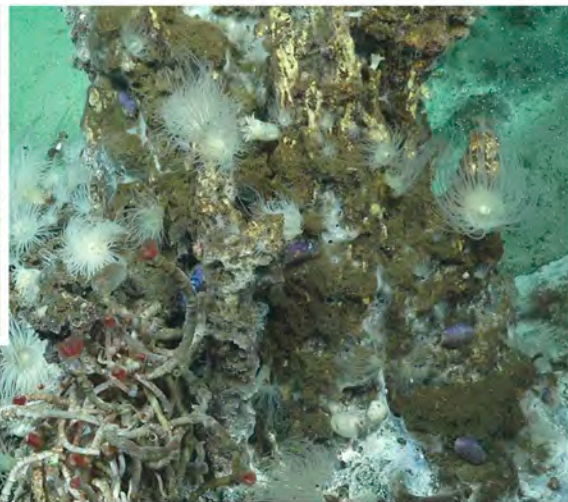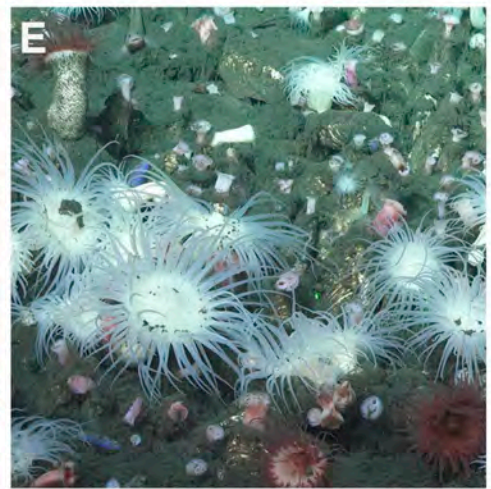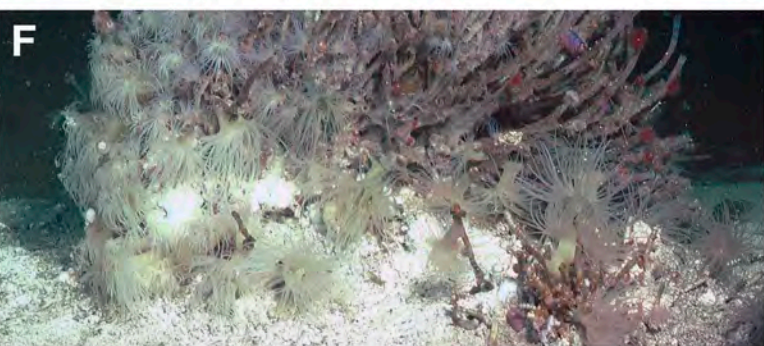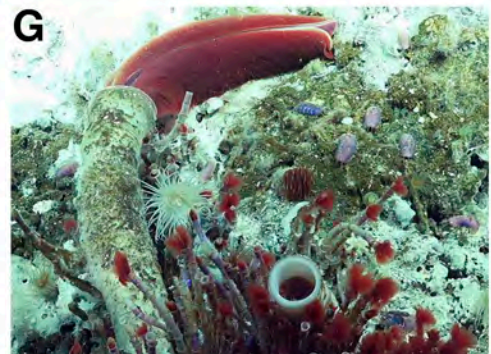

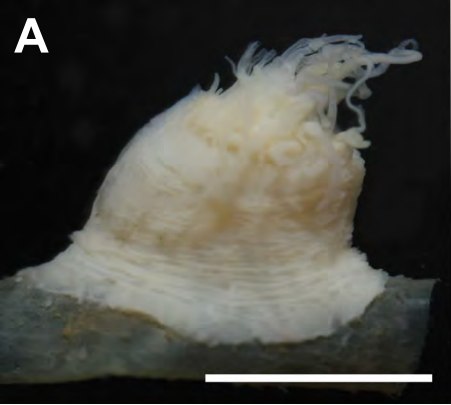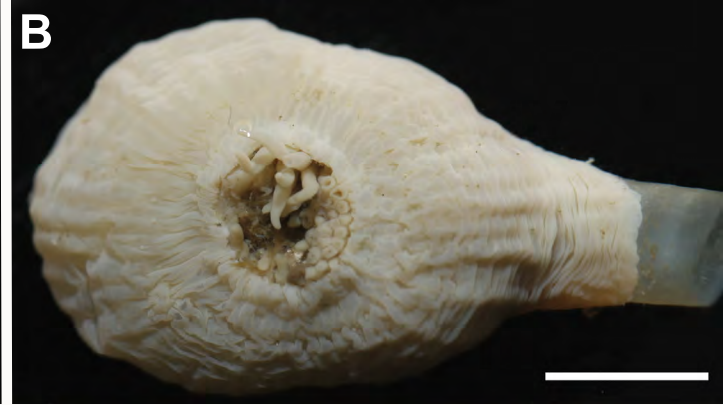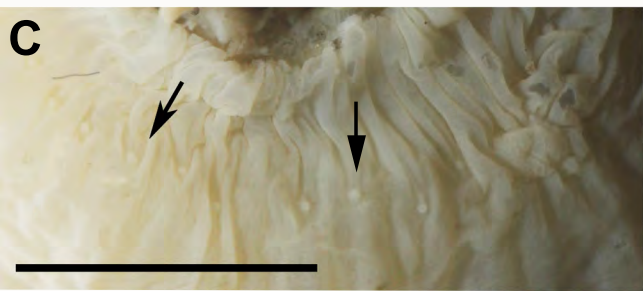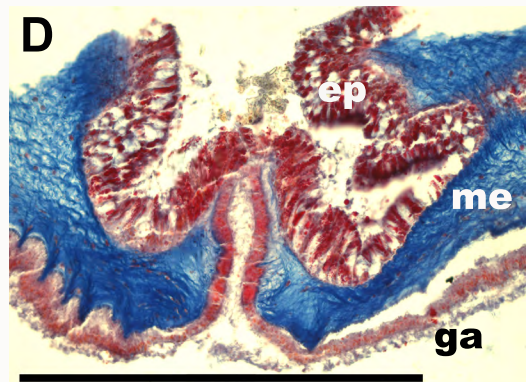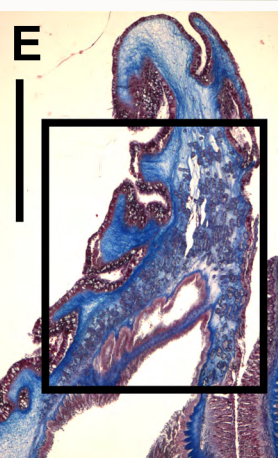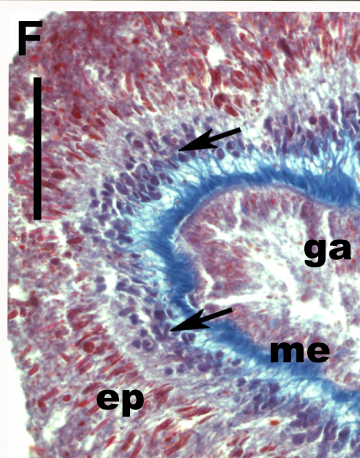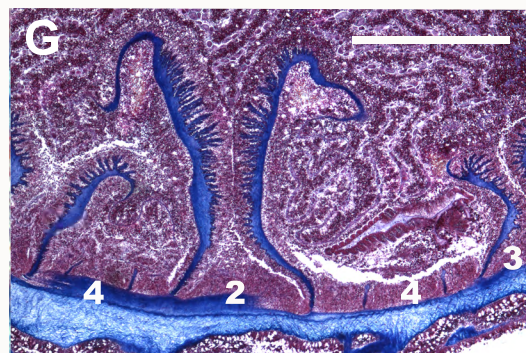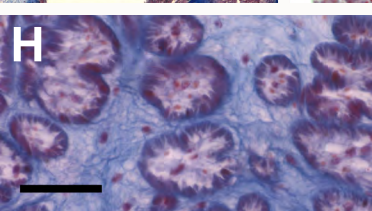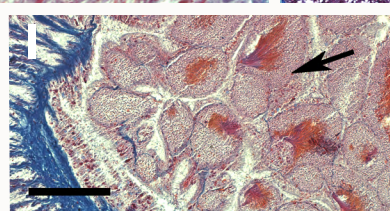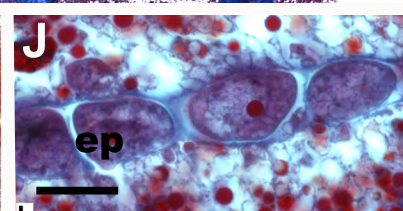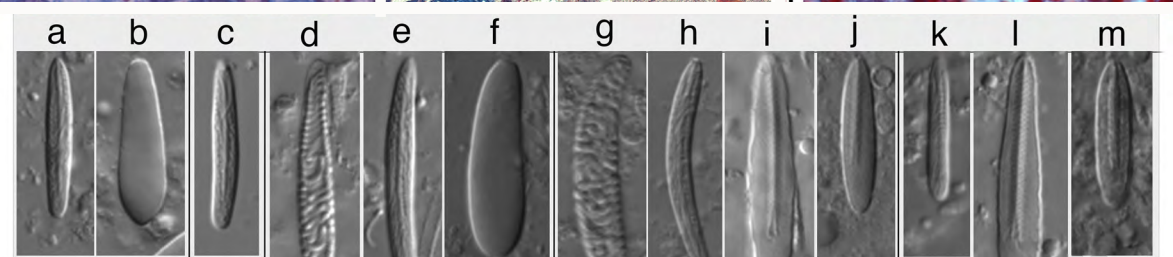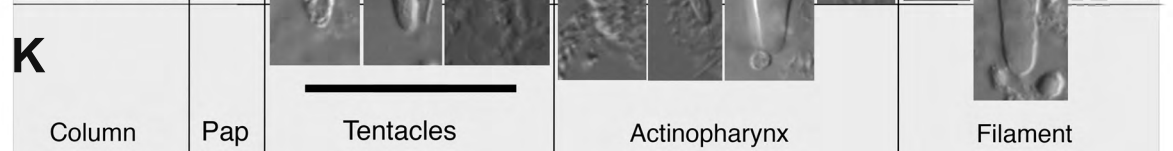

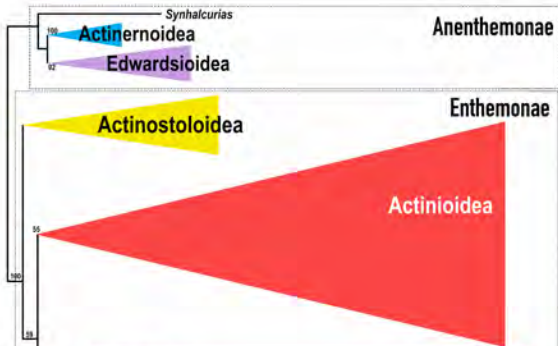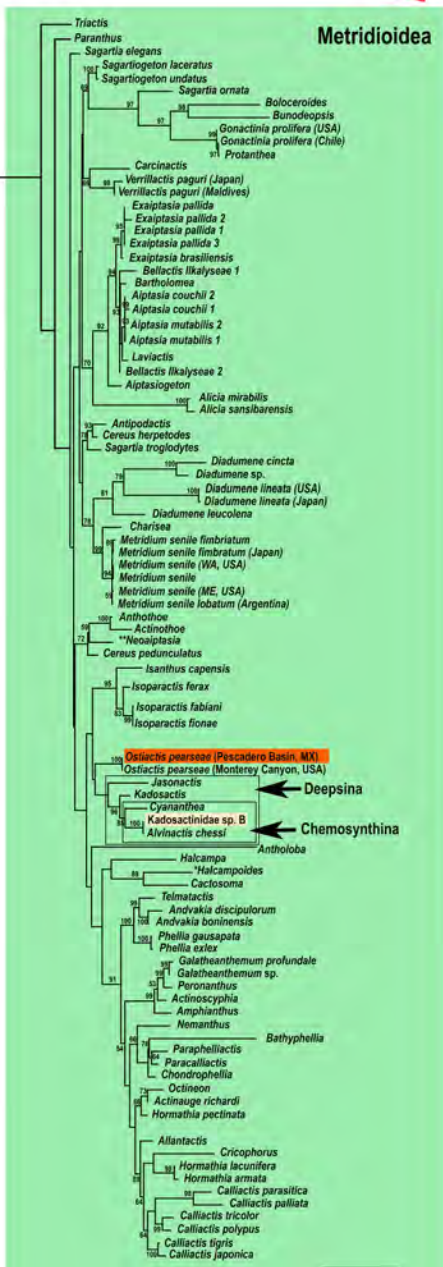

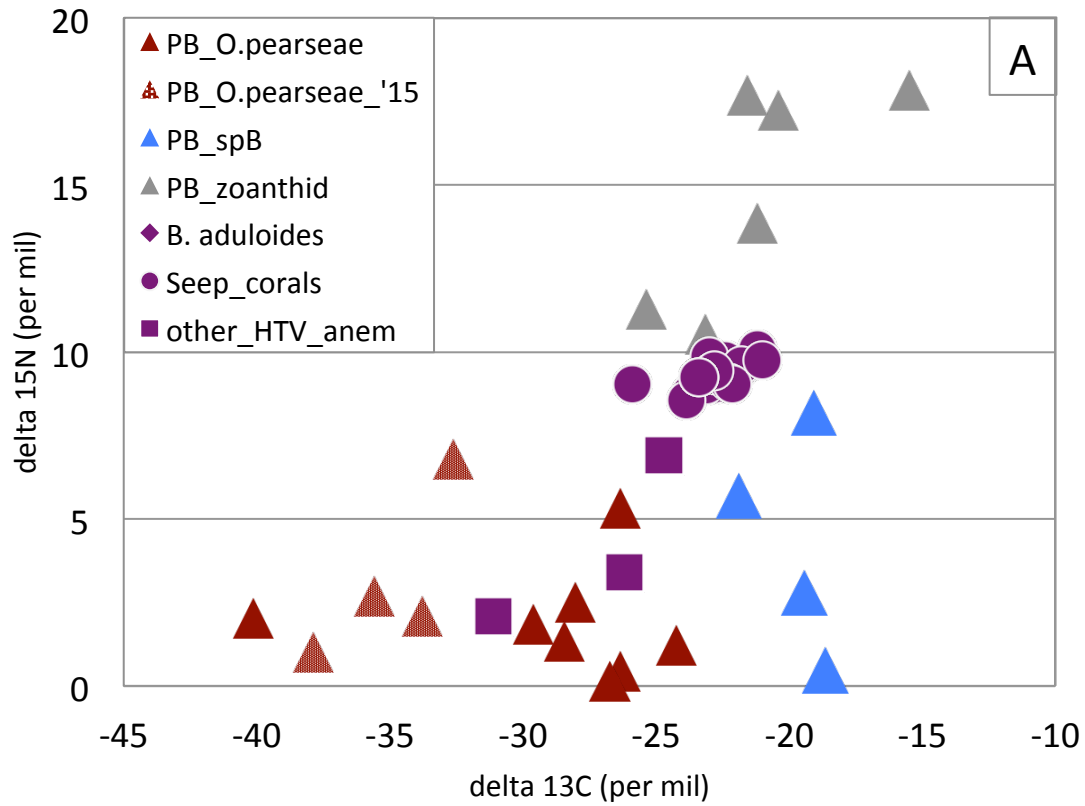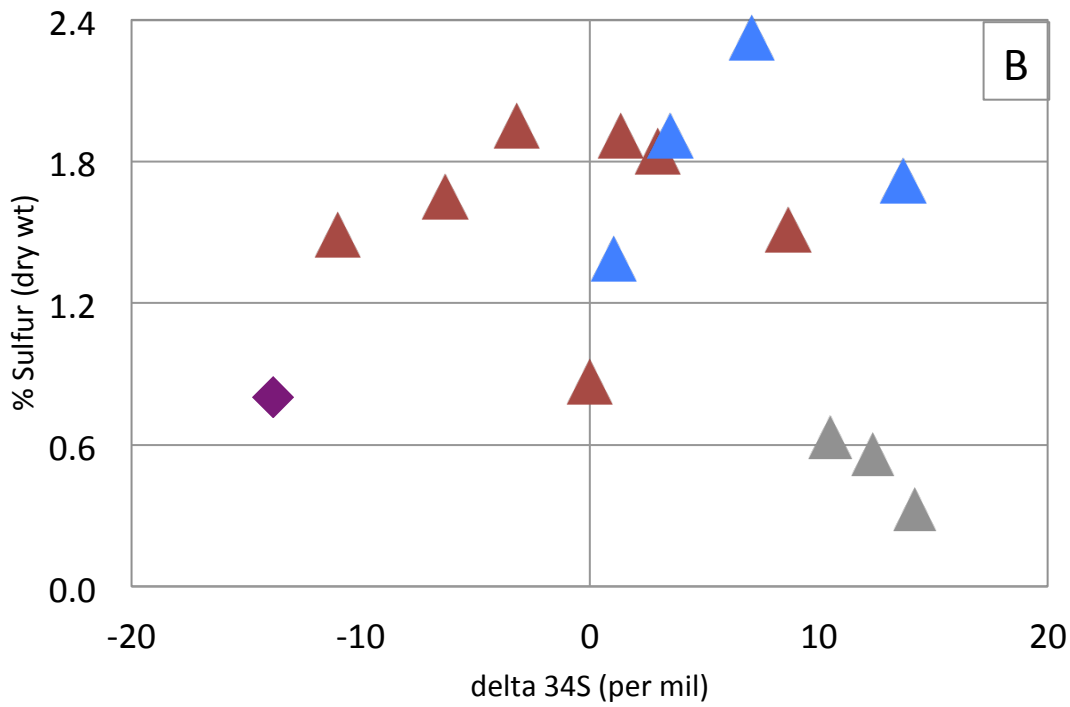

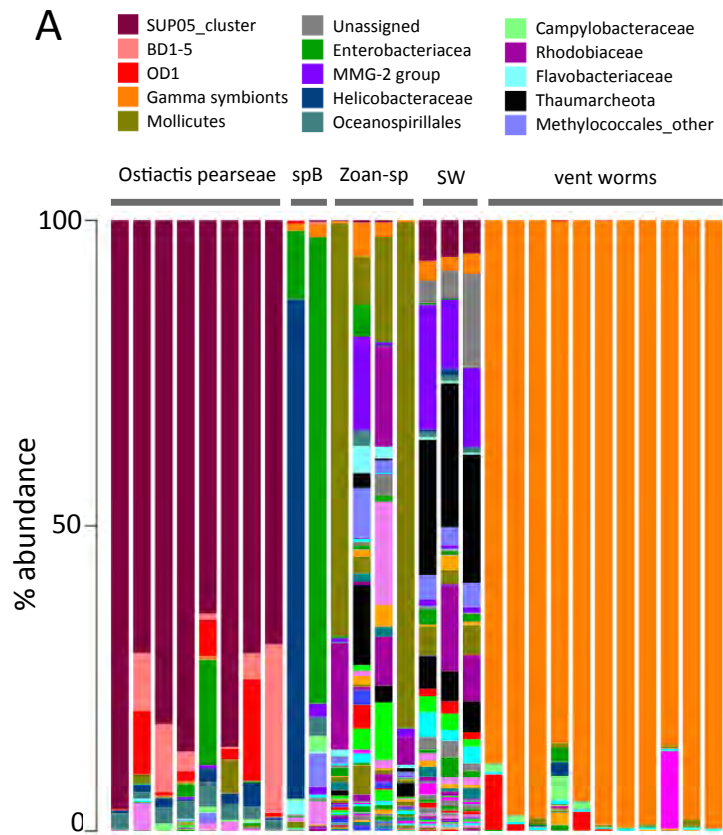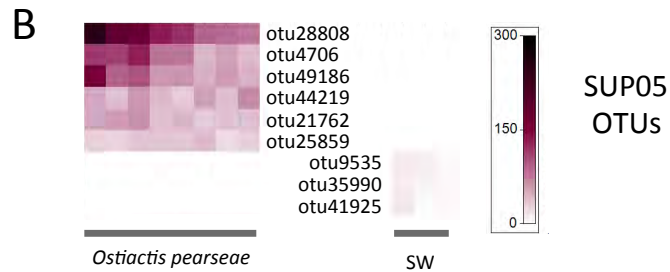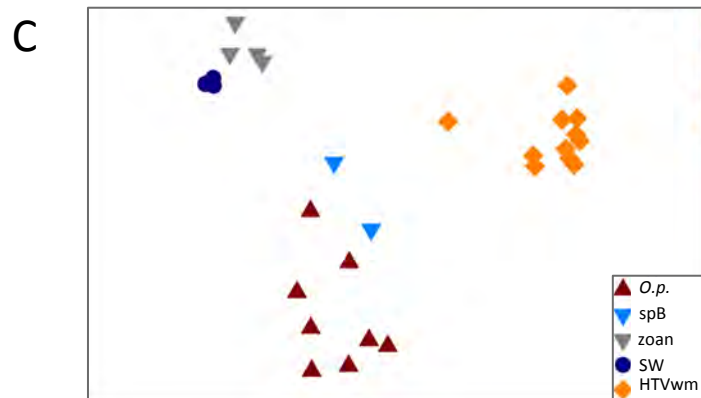

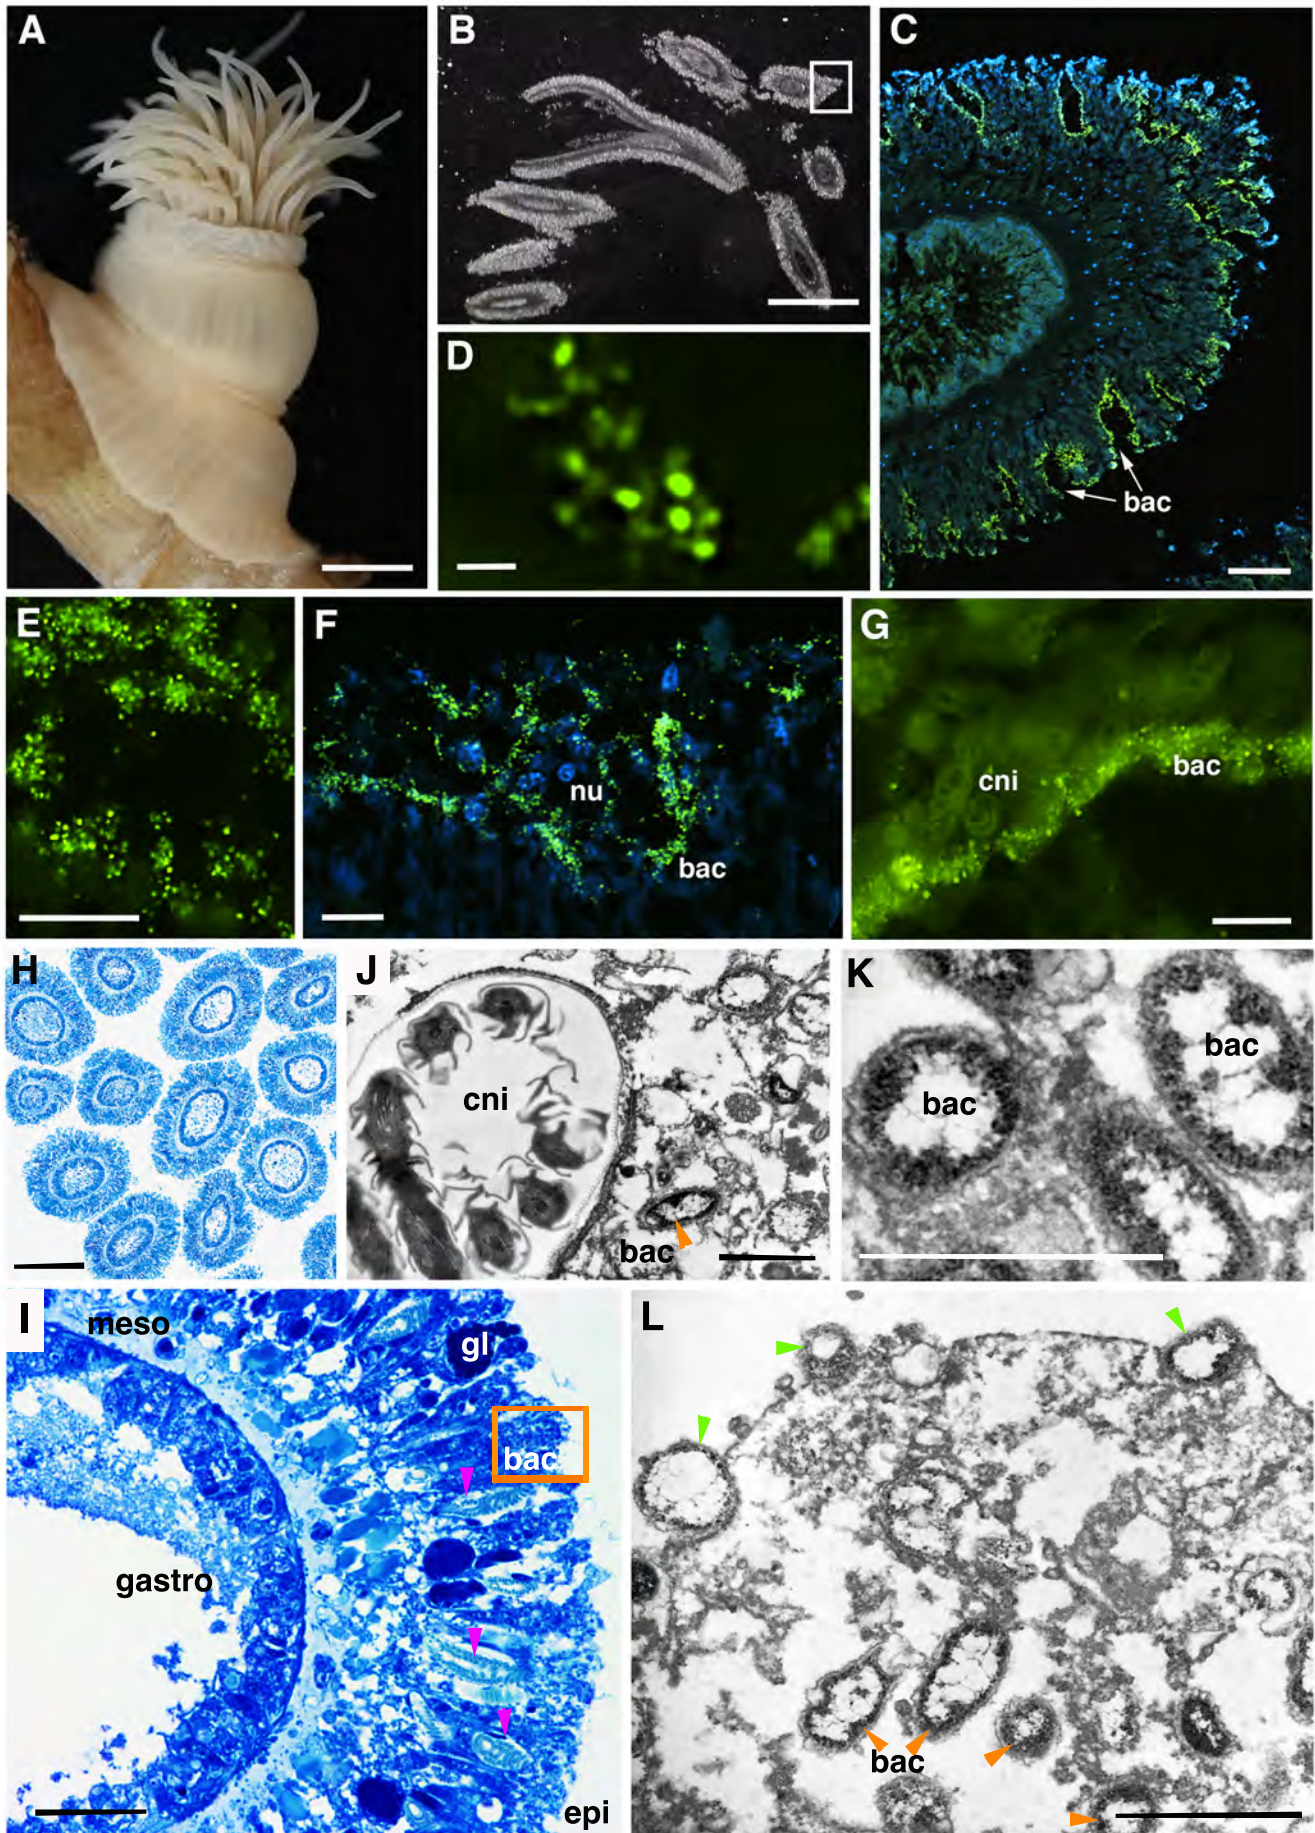

## Supplemental Information – Goffredi et al.

**Table S1:** Number of total 16S rRNA amplicon reads, the Shannon Diversity index ( $H'$ ) and the relative abundance (%) of the SUP05 group (based on 16S rRNA barcode amplification) associated with *Ostiactis pearseae*, water samples, and other Anthozoa from the Pescadero Basin vents.

**Table S2:** Taxa included in this study, with voucher location and GenBank accession numbers. Taxa are organized alphabetically within their family; new sequences indicated in bold.

### **Fig. S1 Phylogenetic relationships of the SUP05 group, based on 16S rRNA.**

**A.** SUP05 cluster, based on 16S rRNA. Taxa shown in green are known symbionts of marine invertebrates. \* > 70% support (using the Jukes Kantor model). Additional taxa were included according to Petersen et al. 2012; Glaubitz et al. 2013; Shah et al 2019.

**Inset.** Shows SUP05 amplicons recovered from *Ostiactis pearseae*, surrounding seawater samples, and *Bathymodiolus* mussels from the Costa Rica margin Jaco Scar seep sites (SG, unpublished).

### **Fig. S2 Fluorescence Microscopy of the tentacles of *Ostiactis pearseae*.**

Fluorescent *in situ* signal amplification via hybridization chain reaction-FISH (HCR-FISH) microscopy of *Ostiactis pearseae* tentacles using **A.** a general bacterial probe set Eub338 I-III, **B.** the specific Anem\_SUP05 probe, and **C.** an overlay of the two showing near complete overlap. Scale is 10  $\mu\text{m}$ .

Available from the Dryad Digital Repository (<https://doi.org/10.5061/dryad.mkkwh70wt>)

**Supp Video:** Sea anemones were collected by ROV manipulator or suction sampler mounted on ROV *SuBastian*.

### **DataFile S1**

The raw Illumina barcode sequence data and QIIME processed data, including representative sequences for all OTUs, as well as representative sequences for the SUP05 OTUs specifically.

**Supp Table 1:** Number of total 16S rRNA amplicon reads, the Shannon Diversity index (H') and the relative abundance (%) of the SUP05 group (based on 16S rRNA barcode amplification) associated with *Ostiactis pearseae*, water samples, and other Anthozoa from the Pescadero Basin vents.

| <i>Ostiactis pearseae</i>    |                 |            |                       |         |
|------------------------------|-----------------|------------|-----------------------|---------|
| Auka vent field              | Dive #-Sample # | # of reads | H' index <sup>1</sup> | % SUP05 |
| Matterhorn                   | S0193-R2        | 11596      | 2.13                  | 96.4    |
| E. of Diane's vent           | S0193-A2        | 1852       | 2.79                  | 70.9    |
| Z vent (top)                 | S0194-S2        | 2405       | 2.60                  | 82.5    |
| S. of Z vent (small chimney) | S0200-R2w       | 21299      | 2.67                  | 87.0    |
| JaichMaa 'ja'ag vent field   |                 |            |                       |         |
| Abuelita                     | S0197           | 16566      | 2.90                  | 64.4    |
| Abuelita                     | S0197-CM2       | 4356       | 2.75                  | 86.2    |
| Abuelita                     | S0197-CM3       | 6028       | 2.97                  | 70.9    |
| Weey 'kual                   | S0199-S8        | 10220      | 2.61                  | 69.4    |
| Water Samples                |                 |            |                       |         |
| Auka vent field              | Dive #-Sample # | # of reads | H' index <sup>2</sup> | % SUP05 |
| E. of Diane's vent           | S0193-N2        | 15754      | 4.38                  | 6.7     |
| JaichMaa 'ja'ag vent field   |                 |            |                       |         |
| Abuelita                     | S0197-N2        | 24802      | 4.91                  | 6.0     |
| Weey 'kual                   | S0199-N1        | 10457      | 4.77                  | 5.5     |
| Other Anthozoa               |                 |            |                       |         |
| Auka vent field              | Dive #-Sample # | # of reads | H' index <sup>2</sup> | % SUP05 |
| Matterhorn                   | S0193-S4        | 1377       | 2.87                  | 0.0     |
| S. of Z vent (small chimney) | S0200-R2r       | 2805       | 3.14                  | 0.3     |
| E. of Diane's vent           | S0193-R3        | 40902      | 2.82                  | 0.1     |
| Z vent (lower on structure)  | S0194-R1        | 2858       | 3.64                  | 0.4     |
| NW. of Z vent (diffuse flow) | S0194-R2        | 2759       | 3.19                  | 0.3     |
| NW. of Z vent (diffuse flow) | S0194-S1        | 47970      | 2.46                  | 0.0     |

<sup>1</sup> based on OTUs, defined as 99% similar based on 16S rRNA



**Table S2**

| Higher taxon  | Family           | Voucher | Genus                  | Species                       | 12S rRNA | 16S rRNA | 18S rRNA | COIII    |
|---------------|------------------|---------|------------------------|-------------------------------|----------|----------|----------|----------|
| Actineroidea  | Actinernidae     | AMNH    | <i>Actinernus</i>      | <i>antarcticus</i>            | KJ482930 | KJ482966 | KJ483023 | -----    |
|               |                  | AMNH    | <i>Isactinernus</i>    | <i>quadrilobatus</i>          | KJ482932 | KJ482968 | KJ483024 | KJ482998 |
|               |                  | NA      | <i>Synhalcurias</i>    | <i>elegans</i>                | KJ482942 | -----    | KJ483021 | -----    |
|               | Halcuriidae      | AMNH    | <i>Halcurias</i>       | <i>pilatus</i>                | KJ482931 | KJ482967 | KJ483020 | KJ482997 |
| Edwardsioidea | Edwardsiidae     | AMNH    | <i>Edwardsia</i>       | <i>elegans</i>                | EU190726 | EU190770 | EU190857 | GU473338 |
|               |                  | KUNHM   | <i>Edwardsia</i>       | <i>japonica</i>               | GU473274 | GU473288 | GU473304 | GU473359 |
|               |                  | KBPGI   | <i>Edwardsiella</i>    | <i>loveni</i>                 | KX946216 | KX946212 | KX946218 | KX946217 |
|               |                  | KUNHM   | <i>Edwardsia</i>       | <i>timida</i>                 | GU473281 | KT852113 | GU473315 | KT852332 |
|               |                  | AMNH    | <i>Edwardsianthus</i>  | <i>gilbertensis</i>           | EU190728 | EU190772 | EU190859 | -----    |
|               |                  | KUNHM   | <i>Nematostella</i>    | <i>vectensis</i>              | EU190750 | AY169370 | AF254382 | FJ489501 |
| Actinioidea   | Actiniidae       | CAS     | <i>Actinia</i>         | <i>fragacea</i>               | EU190714 | EU190756 | EU190845 | GU473334 |
|               |                  | KUNHM   | <i>Actinia</i>         | <i>tenebrosa</i>              | KT852045 | KT852111 | KT852174 | KT852330 |
|               |                  | KUNHM   | <i>Anemonia</i>        | <i>erythraea</i>              | KY789302 | KY789335 | -----    | KY789271 |
|               |                  | CAS     | <i>Anemonia</i>        | <i>viridis</i>                | EU190718 | EU190760 | EU190849 | GU473335 |
|               |                  | KUNHM   | <i>Anthopleura</i>     | <i>anneae</i>                 | KY789327 | KY789360 | -----    | KY789293 |
|               |                  | NA      | <i>Anthopleura</i>     | <i>artemisia</i>              | KT852015 | KT852081 | KT852148 | KT852300 |
|               |                  | NA      | <i>Anthopleura</i>     | <i>atodai</i>                 | KT851993 | KT852055 | KT852123 | KT852275 |
|               |                  | KUNHM   | <i>Anthopleura</i>     | <i>ballii</i>                 | KY789311 | KY789346 | -----    | KY789281 |
|               |                  | KUNHM   | <i>Anthopleura</i>     | <i>biscavensis</i>            | KY789315 | KY789350 | -----    | KY789284 |
|               |                  | KUNHM   | <i>Anthopleura</i>     | <i>buddemeieri</i>            | KY789316 | KY789351 | -----    | -----    |
|               |                  | KUNHM   | <i>Anthopleura</i>     | <i>dixoniana</i>              | KY789307 | KY789341 | -----    | KY789276 |
|               |                  | KUNHM   | <i>Anthopleura</i>     | <i>dowii</i>                  | KY789318 | KY789353 | -----    | KY789286 |
|               |                  | NA      | <i>Anthopleura</i>     | <i>elegantissima</i>          | EU190713 | EU190755 | EU190844 | GU473333 |
|               |                  | KUNHM   | <i>Anthopleura</i>     | <i>fuscoviridis</i>           | KY789303 | KY789336 | -----    | KY789272 |
|               |                  | NA      | <i>Anthopleura</i>     | <i>handi</i>                  | KT852013 | KT852079 | KT852146 | KT852298 |
|               |                  | KUNHM   | <i>Anthopleura</i>     | <i>insignis</i>               | KY789331 | KY789364 | -----    | KY789297 |
|               |                  | KUNHM   | <i>Anthopleura</i>     | <i>krebsi</i>                 | KY789305 | KY789339 | -----    | KY789275 |
|               |                  | KUNHM   | <i>Anthopleura</i>     | <i>kurogane</i> (Korea)       | KY789321 | KY789355 | -----    | KY789288 |
|               |                  | KUNHM   | <i>Anthopleura</i>     | <i>midori</i>                 | KY789324 | -----    | -----    | KY789289 |
|               |                  | KUNHM   | <i>Anthopleura</i>     | <i>nigrescens</i> (Galapagos) | -----    | KY789343 | -----    | KY789278 |
|               |                  | KUNHM   | <i>Anthopleura</i>     | <i>pacifica</i>               | KY789309 | KY789344 | -----    | KY789279 |
|               |                  | NA      | <i>Anthopleura</i>     | <i>rosea</i>                  | KT852039 | KT852104 | KT852168 | KT852324 |
|               |                  | KUNHM   | <i>Anthopleura</i>     | sp. "inornata"                | KY789304 | KY789338 | -----    | KY789274 |
|               |                  | KUNHM   | <i>Anthopleura</i>     | <i>thallia</i>                | KY789333 | KY789366 | -----    | KY789300 |
|               |                  | KUNHM   | <i>Anthopleura</i>     | <i>waridi</i>                 | KY789301 | KY789334 | -----    | KY789270 |
|               |                  | KUNHM   | <i>Anthostella</i>     | <i>stephensoni</i>            | JQ810719 | JQ810721 | JQ810723 | JQ810726 |
|               |                  | NA      | <i>Aulactinia</i>      | <i>incubans</i>               | KT852014 | KT852080 | KT852147 | KT852299 |
|               |                  | AMNH    | <i>Aulactinia</i>      | <i>marplatensis</i>           | KT851999 | KT852061 | KT852129 | KT852281 |
|               |                  | AMNH    | <i>Aulactinia</i>      | <i>stella</i>                 | KT852044 | KT852110 | KT852173 | KT852329 |
|               |                  | AMNH    | <i>Aulactinia</i>      | <i>vancouverensis</i>         | KT852019 | KT852085 | KT852151 | KT852305 |
|               |                  | AMNH    | <i>Aulactinia</i>      | <i>veratra</i>                | KT852001 | KT852063 | KT852131 | KT852283 |
|               |                  | AMNH    | <i>Bolocera</i>        | <i>kerquelensis</i>           | KJ482925 | KJ482965 | KJ483029 | KJ482985 |
|               |                  | NA      | <i>Bunodactis</i>      | <i>reynaudi</i>               | KT852041 | KT852106 | KT852170 | KT852326 |
|               |                  | KUNHM   | <i>Bunodactis</i>      | <i>verrucosa</i>              | EU190723 | EU190766 | EU190854 | FJ489484 |
|               |                  | KUNHM   | <i>Bunodosoma</i>      | <i>cavernatum</i>             | KY789313 | KY789348 | -----    | KY789282 |
|               |                  | KUNHM   | <i>Bunodosoma</i>      | <i>grandis</i>                | EU190722 | EU190765 | EU190853 | GU473336 |
|               |                  | KUNHM   | <i>Bunodosoma</i>      | <i>granuliferum</i>           | KY789314 | KY789349 | -----    | KY789283 |
|               |                  | MV      | <i>Epiactis</i>        | <i>australiensis</i>          | KT852000 | KT852062 | KT852130 | KT852282 |
|               |                  | NA      | <i>Epiactis</i>        | <i>fernaldi</i>               | KT852005 | KT852068 | KT852136 | KT852288 |
|               |                  | NA      | <i>Epiactis</i>        | <i>georgiana</i>              | KT852007 | KT852070 | KT852138 | KT852290 |
|               |                  | AMNH    | <i>Epiactis</i>        | <i>handi1</i>                 | KT851988 | KT852050 | KT852118 | KT852269 |
|               |                  | AMNH    | <i>Epiactis</i>        | <i>handi2</i>                 | KT851990 | KT852052 | KT852120 | KT852271 |
|               |                  | AMNH    | <i>Epiactis</i>        | <i>japonica1</i>              | KT851991 | KT852053 | KT852121 | KT852272 |
|               |                  | AMNH    | <i>Epiactis</i>        | <i>japonica2</i>              | KT852048 | KT852116 | KT852178 | KT852333 |
|               |                  | AMNH    | <i>Epiactis</i>        | <i>japonica3</i>              | KY789317 | KY789352 | -----    | KY789285 |
|               |                  | AMNH    | <i>Epiactis</i>        | <i>lisbethae1</i>             | KT852006 | KT852069 | KT852137 | KT852289 |
|               |                  | AMNH    | <i>Epiactis</i>        | <i>lisbethae2</i>             | EU190727 | EU190771 | EU190858 | GU473360 |
|               |                  | AMNH    | <i>Epiactis</i>        | <i>prolifera</i>              | KT851989 | KT852051 | KT852119 | KT852270 |
|               |                  | AMNH    | <i>Epiactis</i>        | <i>ritteri1</i>               | KT851994 | KT852056 | KT852124 | KT852276 |
|               |                  | AMNH    | <i>Epiactis</i>        | <i>ritteri2</i>               | KT851995 | KT852057 | KT852125 | KT852277 |
|               |                  | AMNH    | <i>Epiactis</i>        | <i>thompsoni</i>              | KT852011 | KT852074 | KT852142 | KT852294 |
|               |                  | AMNH    | <i>Glyphoperidium</i>  | <i>bursa</i>                  | KJ482923 | KJ482961 | KJ483033 | KJ482982 |
|               |                  | NA      | <i>Gyrectis</i>        | <i>sesere</i>                 | KT852012 | KT852078 | KT852145 | KT852297 |
|               |                  | AMNH    | <i>Isactinia</i>       | <i>olivacea</i>               | -----    | KT852077 | KT852144 | KT852296 |
|               |                  | AMNH    | <i>Isotelia</i>        | <i>antarctica</i>             | JQ810720 | JQ810722 | -----    | JQ810727 |
|               |                  | AMNH    | <i>Korsaranthus</i>    | <i>natalensis</i>             | KJ482920 | KJ482958 | KJ483017 | KJ482987 |
|               |                  | KUNHM   | <i>Macroactyla</i>     | <i>doreenensis</i>            | EU190739 | EU190785 | EU190867 | GU473342 |
|               |                  | AMNH    | <i>Oulactis</i>        | <i>muscosa</i>                | KT852033 | KT852097 | KT852162 | KT852317 |
|               |                  | KUNHM   | <i>Phlyctenactis</i>   | <i>tuberculosa</i>            | KY789326 | KY789359 | -----    | KY789292 |
|               |                  | KUNHM   | <i>Pseudactinia</i>    | <i>varia</i>                  | KY789328 | KY789361 | -----    | KY789294 |
|               |                  | KUNHM   | <i>Urticina</i>        | <i>coriacea</i>               | GU473282 | EU190797 | KT852176 | GU473351 |
|               |                  | AMNH    | <i>Urticina</i>        | <i>erassicornis</i>           | KT851997 | KT852059 | KT852127 | KT852279 |
|               |                  | CMNI    | <i>Urticina</i>        | <i>fecunda</i>                | KT852004 | KT852067 | KT852135 | KT852287 |
|               |                  | AMNH    | <i>Urticina</i>        | <i>grebelnyi</i>              | KT852034 | KT852098 | KT852163 | KT852318 |
|               | Actinodendriidae | KUNHM   | <i>Actinostephanus</i> | <i>haeckeli</i>               | EU190762 | EU190762 | KJ483034 | GU473353 |
|               | Capneidae        | AMNH    | <i>Capnea</i>          | <i>georgiana</i>              | -----    | KJ482951 | KJ483022 | KJ482990 |

|                   |                  |       |                        |                          |          |          |          |          |
|-------------------|------------------|-------|------------------------|--------------------------|----------|----------|----------|----------|
|                   | Condyllanthidae  | AMNH  | <i>Charisea</i>        | <i>saxicola</i>          | KT852020 | KT852086 | KT852152 | KT852306 |
|                   | Haloclavidae     | KUNHM | <i>Haloclava</i>       | sp.                      | KJ482924 | KJ482963 | KJ483031 | KJ482989 |
|                   |                  | AMNH  | <i>Haloclava</i>       | <i>producta</i>          | EU190734 | EU190779 | AF254370 | JF833008 |
|                   |                  | AMNH  | <i>Harenactis</i>      | <i>argentina</i>         | KJ482926 | KJ482964 | KJ483026 | KJ482984 |
|                   |                  | KUNHM | <i>Peachia</i>         | <i>cylindrica</i>        | EU190743 | EU190789 | KJ483015 | -----    |
|                   |                  | AMNH  | <i>Stephanthus</i>     | <i>antarcticus</i>       | KJ482927 | KJ482960 | KJ483019 | KJ482983 |
|                   | Liponematidae    | KUNHM | <i>Liponema</i>        | <i>brevicornis</i>       | EU190738 | EU190784 | EU190866 | KJ483001 |
|                   |                  | AMNH  | <i>Liponema</i>        | <i>multiplorum</i>       | KJ482922 | KJ482962 | -----    | -----    |
|                   | Phymanthidae     | KUNHM | <i>Phymanthus</i>      | <i>loligo</i>            | EU190745 | EU190791 | EU190871 | GU473345 |
|                   |                  | AMNH  | <i>Phymanthus</i>      | <i>crucifer1</i>         | KJ910343 | KJ910345 | MH670399 | KJ910346 |
|                   |                  | AMNH  | <i>Phymanthus</i>      | <i>crucifer2</i>         | KJ910344 | KJ910345 | MH670402 | KJ910346 |
|                   |                  | AMNH  | <i>Phymanthus</i>      | <i>crucifer3</i>         | KJ910343 | KJ910345 | MH670404 | KJ910346 |
|                   | Preactiidae      | AMNH  | <i>Preactis</i>        | <i>milliardae</i>        | KJ482921 | KJ482957 | KJ483018 | KJ482986 |
|                   |                  | AMNH  | <i>Dactylanthus</i>    | <i>antarcticus</i>       | GU473272 | AY345877 | AF052896 | GU473358 |
|                   | Stichodactylidae | KUNHM | <i>Heteractis</i>      | <i>magnifica</i>         | EU190732 | EU190777 | EU190862 | KJ482988 |
|                   |                  | KUNHM | <i>Stichodactyla</i>   | <i>gigantea</i>          | EU190747 | EU190793 | -----    | KY789299 |
| Actinostoloidea   | Actinostolidae   | AMNH  | <i>Actinostola</i>     | <i>chilensis</i>         | -----    | GU473285 | GU473302 | GU473357 |
|                   |                  | AMNH  | <i>Actinostola</i>     | <i>crassicornis</i>      | -----    | EU190753 | EU190843 | GU473332 |
|                   |                  | AMNH  | <i>Actinostola</i>     | <i>georgiana</i>         | KJ482928 | KJ482952 | KJ483032 | KJ482991 |
|                   |                  | AMNH  | <i>Antholoba</i>       | <i>achates*</i>          | GU473269 | GU473284 | GU473301 | GU473356 |
|                   |                  | AMNH  | <i>Anthosactis</i>     | <i>janmaveni</i>         | KJ482938 | GU473292 | GU473308 | GU473363 |
|                   |                  | AMNH  | <i>Hormosoma</i>       | <i>scotti</i>            | EU190733 | EU190778 | EU190863 | GU473366 |
|                   |                  | AMNH  | <i>Paranthus</i>       | <i>niveus*</i>           | GU473277 | GU473295 | GU473311 | GU473344 |
|                   |                  | KUNHM | <i>Stomphia</i>        | <i>didemon</i>           | KJ482929 | EU190795 | EU190875 | GU473348 |
|                   |                  | AMNH  | <i>Stomphia</i>        | <i>selaginella</i>       | GU473280 | GU473298 | GU473314 | GU473349 |
| Metridioidea      | Actinoscyphiidae | AMNH  | <i>Actinoscyphia</i>   | <i>plebeia</i>           | EU190712 | EU190754 | FJ489437 | FJ489476 |
|                   | Aiptasiidae      | AMNH  | <i>Aiptasia</i>        | <i>couchii1</i>          | KP761199 | KP761254 | KP761301 | KP761405 |
|                   |                  | AMNH  | <i>Aiptasia</i>        | <i>couchii2</i>          | KP761200 | KP761255 | KP761303 | KP761403 |
|                   |                  | KUNHM | <i>Aiptasia</i>        | <i>mutabilis1</i>        | JF832963 | FJ489418 | FJ489438 | FJ489505 |
|                   |                  | AMNH  | <i>Aiptasia</i>        | <i>mutabilis2</i>        | KP761194 | KP761248 | KP761300 | KP761404 |
|                   |                  | AMNH  | <i>Aiptasiogeton</i>   | <i>hyalinus</i>          | KR704266 | KR186040 | KR704268 | -----    |
|                   |                  | AMNH  | <i>Bartholomea</i>     | <i>annulata</i>          | EU190721 | EU190763 | EU190851 | FJ489483 |
|                   |                  | AMNH  | <i>Bellactis</i>       | <i>ilkalyseae1</i>       | -----    | KP761238 | KP761316 | KP761393 |
|                   |                  | AMNH  | <i>Bellactis</i>       | <i>ilkalyseae2</i>       | KR186020 | KR186036 | KR186051 | -----    |
|                   |                  | AMNH  | <i>Exaiptasia</i>      | <i>brasiliensis</i>      | KP761188 | KP761239 | KP761312 | KP761386 |
|                   |                  | AMNH  | <i>Exaiptasia</i>      | <i>pallida1</i>          | KP761183 | KP761270 | KP761286 | -----    |
|                   |                  | AMNH  | <i>Exaiptasia</i>      | <i>pallida2</i>          | KP761176 | KP761226 | KP761280 | KP761376 |
|                   |                  | AMNH  | <i>Exaiptasia</i>      | <i>pallida3</i>          | KP761177 | KP761227 | KP761322 | KP761377 |
|                   |                  | AMNH  | <i>Laviactis</i>       | <i>lucida</i>            | KP761192 | KP761243 | KP761296 | KP761402 |
|                   |                  | KUNHM | <i>Neoiptasia</i>      | <i>morbilli**</i>        | EU190742 | EU190788 | -----    | JF833010 |
| Aliciidae         |                  | AMNH  | <i>Alicia</i>          | <i>mirabilis</i>         | KP761213 | -----    | KP761310 | KP761410 |
|                   |                  | AMNH  | <i>Alicia</i>          | <i>sansibarensis</i>     | KJ482933 | KJ482953 | KJ483016 | KJ483000 |
|                   |                  | KUNHM | <i>Triactis</i>        | <i>producta</i>          | EU490525 | -----    | EU190876 | GU473350 |
| Amphianthidae     |                  | USNM  | <i>Amphianthus</i>     | sp.                      | FJ489413 | FJ489432 | FJ489450 | FJ489502 |
|                   |                  | AMNH  | <i>Peronanthus</i>     | sp.                      | KJ482917 | KJ482956 | KJ483014 | KJ482976 |
| Andvakiidae       |                  | KUNHM | <i>Andvakia</i>        | <i>boninensis</i>        | EU190717 | EU190759 | EU190848 | FJ489479 |
|                   |                  | KUNHM | <i>Andvakia</i>        | <i>discipulorum</i>      | GU473273 | GU473287 | GU473316 | -----    |
|                   |                  | AMNH  | <i>Telmatactis</i>     | sp.                      | JF832968 | JF832979 | KJ483013 | -----    |
| Antipodactinidae  |                  | AMNH  | <i>Antipodactis</i>    | <i>awii</i>              | GU473271 | GU473286 | GU473303 | GU473337 |
| Bathypheiliidae   |                  | KUNHM | <i>Bathypheilia</i>    | <i>australis</i>         | FJ489402 | FJ489422 | EF589063 | FJ489482 |
| Boloceroideidae   |                  | KUNHM | <i>Bolocerooides</i>   | <i>mcmurrici</i>         | GU473270 | -----    | EU190852 | -----    |
|                   |                  | AMNH  | <i>Bunodeopsis</i>     | <i>globulifera</i>       | KJ482940 | KJ482949 | KJ483025 | KJ482992 |
| Diadumenidae      |                  | KUNHM | <i>Diadumene</i>       | <i>cineta</i>            | EU190725 | EU190769 | EU190856 | FJ489490 |
|                   |                  | KUNHM | <i>Diadumene</i>       | <i>leucolena</i>         | JF832957 | JF832977 | JF832986 | JF833006 |
|                   |                  | KUNHM | <i>Diadumene</i>       | sp.                      | JF832960 | JF832976 | JF832980 | JF833005 |
|                   |                  | KUNHM | <i>Diadumene</i>       | <i>lineata</i> (Japan)   | JF832965 | JF832973 | JF832987 | JF833007 |
|                   |                  | KUNHM | <i>Diadumene</i>       | <i>lineata</i> (USA)     | EU190730 | EU190774 | EU190860 | FJ489506 |
| Galatheanthemidae |                  | AMNH  | <i>Galatheanthemum</i> | <i>profundale</i>        | KJ482919 | KJ482954 | KJ483011 | KJ482978 |
|                   |                  | AMNH  | <i>Galatheanthemum</i> | sp. nov.                 | KJ482918 | KJ482955 | KJ483012 | KJ482977 |
| Gonactiniidae     |                  | AMNH  | <i>Gonactinia</i>      | <i>prolifera</i> (Chile) | KJ482935 | -----    | KJ483008 | KJ482994 |
|                   |                  | AMNH  | <i>Gonactinia</i>      | <i>prolifera</i> (USA)   | KJ482937 | KJ482969 | KJ483009 | KJ482995 |
|                   |                  | AMNH  | <i>Protantea</i>       | <i>simplex</i>           | KJ482939 | KJ482970 | KJ483010 | KJ482993 |
| Halcampidae       |                  | AMNH  | <i>Cactosoma</i>       | sp. nov.                 | FJ489407 | GU473297 | GU473313 | GU473346 |
|                   |                  | KUNHM | <i>Halcampa</i>        | <i>duodecimcirrata</i>   | JF832966 | EU190776 | AF254375 | -----    |
|                   |                  | AMNH  | <i>Halcampoides</i>    | <i>purpureus</i>         | EU190735 | EU190780 | AF254380 | -----    |
| Hormathiidae      |                  | KUNHM | <i>Actinauge</i>       | <i>richardi</i>          | EU190719 | EU190761 | EU190850 | FJ489480 |
|                   |                  | KUNHM | <i>Allantactis</i>     | <i>parasitica</i>        | FJ489399 | FJ489420 | FJ489439 | FJ489478 |
|                   |                  | KUNHM | <i>Calliactis</i>      | <i>japonica</i>          | FJ489403 | FJ489423 | FJ489441 | FJ489486 |
|                   |                  | KUNHM | <i>Calliactis</i>      | <i>pallata</i>           | FJ489398 | FJ489419 | FJ489436 | FJ489474 |
|                   |                  | KUNHM | <i>Calliactis</i>      | <i>parasitica</i>        | EU190711 | EU190752 | EU190842 | FJ489475 |
|                   |                  | KUNHM | <i>Calliactis</i>      | <i>polypus</i> (Hawaii)  | FJ489407 | FJ489427 | FJ489445 | FJ489485 |
|                   |                  | KUNHM | <i>Calliactis</i>      | <i>tricolor</i>          | FJ489405 | FJ489425 | FJ489443 | FJ489488 |
|                   |                  | AM    | <i>Calliactis</i>      | <i>tigris</i>            | MK801512 | MK801514 | MK801510 | MK801561 |
|                   |                  | USNM  | <i>Chondrophellia</i>  | <i>orangina</i>          | FJ489406 | FJ489426 | FJ489444 | FJ489489 |
|                   |                  | AMNH  | <i>Cricophorus</i>     | <i>nutrix</i>            | -----    | KT852066 | KT852134 | KT852286 |
|                   |                  | AMNH  | <i>Hormathia</i>       | <i>armata</i>            | EU190731 | EU190775 | EU190861 | FJ489491 |
|                   |                  | AMNH  | <i>Hormathia</i>       | <i>lacunifera</i>        | FJ489409 | FJ489428 | FJ489446 | FJ489492 |

|  |                |            |                         |                                      |            |            |            |            |
|--|----------------|------------|-------------------------|--------------------------------------|------------|------------|------------|------------|
|  |                | AMNH       | <i>Hormathia</i>        | <i>pectinata</i>                     | FJ489415   | FJ489430   | FJ489448   | FJ489497   |
|  |                | CMHN       | <i>Paracalliactis</i>   | <i>japonica</i>                      | FJ489411   | FJ489429   | FJ489447   | FJ489496   |
|  |                | AMNH       | <i>Paracalliactis</i>   | sp.                                  | MK801513   | MK801515   | MK801511   | MK801562   |
|  |                | KUNHM      | <i>Paraphelliactis</i>  | sp.                                  | FJ489412   | FJ489431   | FJ489449   | FJ489498   |
|  | Isanthidae     | AMNH       | <i>Isanthus</i>         | <i>capensis</i>                      | JF832967   | GU473291   | GU473291   | GU473362   |
|  |                | AMNH       | <i>Isoparactis</i>      | <i>fabiani</i>                       | JF832964   | GU473283   | GU473300   | GU473355   |
|  |                | AMNH       | <i>Isoparactis</i>      | <i>fonae</i>                         | KC700001   | KC700003   | KC700004   | KC700007   |
|  |                | AMNH       | <i>Isoparactis</i>      | <i>ferax</i>                         | KC700002   | -----      | KC700005   | KC700008   |
|  | Kadosactinidae | USNM       | <i>Alvinactis</i>       | <i>chessi</i>                        | GU473278   | GU473296   | GU473312   | GU473352   |
|  |                | NA         | <b>Kadosactinidae</b>   | <b>sp.</b>                           | <b>TBD</b> | <b>TBD</b> | -----      | <b>TBD</b> |
|  |                | USNM       | <i>Cyananthea</i>       | <i>hourdezi</i>                      | GU473275   | GU473293   | GU473309   | GU473364   |
|  |                | USNM       | <i>Jasonactis</i>       | <i>erythraios</i>                    | -----      | GU473289   | GU473305   | GU473339   |
|  |                | AMNH       | <i>Kadosactis</i>       | <i>antarctica</i>                    | FJ489410   | EU190782   | EU190865   | FJ489504   |
|  | Metridiidae    | KUNHM      | <i>Metridium</i>        | <i>senile fimbriatum</i>             | KT852023   | KT852089   | JF832988.1 | KT852309   |
|  |                | KUNHM      | <i>Metridium</i>        | <i>s. fibratum</i> (Japan)           | -----      | JF832974   | JF832988   | JF833009   |
|  |                | KUNHM      | <i>Metridium</i>        | <i>s. lobatum</i> (Argentina)        | JF832962   | JF832971   | JF832981   | JF833002   |
|  |                | KUNHM      | <i>Metridium</i>        | <i>senile</i>                        | KT852024   | EU190786   | AF052889   | FJ489494   |
|  |                | AMNH       | <i>Metridium</i>        | <i>senile</i> (ME, USA)              | KJ482916   | KJ482950   | KJ483035   | KJ482975   |
|  |                | KUNHM      | <i>Metridium</i>        | <i>senile</i> (WA, USA)              | EU190740   | JF832972   | JF832982   | JF833003   |
|  | Nemanthidae    | KUNHM      | <i>Nemanthus</i>        | <i>nitidus</i>                       | EU190741   | EU190787   | EU190868   | FJ489495   |
|  | Ostiactinidae  | CAS        | <i>Ostiactis</i>        | <i>pearseae</i> (Monterey Ca)        | EU190751   | EU190798   | EU190878   | GU473365   |
|  |                | <b>SIO</b> | <b><i>Ostiactis</i></b> | <b><i>pearseae</i> (Pescadero B)</b> | <b>TBD</b> | <b>TBD</b> | <b>TBD</b> | <b>TBD</b> |
|  | Phellidae      | ZSM        | <i>Phellia</i>          | <i>exlex</i>                         | JF832958   | JF832978   | JF832984   | JF833004   |
|  |                | KUNHM      | <i>Phellia</i>          | <i>gausapata</i>                     | EU190744   | EU190790   | EU190870   | FJ489473   |
|  | Sagartiidae    | ZSM        | <i>Actinothoe</i>       | <i>sphvrodeta</i>                    | FJ489401   | FJ489421   | FJ489440   | FJ489481   |
|  |                | ZSM        | <i>Actinothoe</i>       | <i>chilensis</i>                     | FJ489397   | FJ489416   | FJ489434   | FJ489470   |
|  |                | KUNHM      | <i>Cereus</i>           | <i>herpetodes</i>                    | JF832956   | JF832969   | JF832983   | -----      |
|  |                | KUNHM      | <i>Cereus</i>           | <i>pedunculatus</i>                  | EU190724   | EU190767   | EU190855   | FJ489471   |
|  |                | KUNHM      | <i>Sagartia</i>         | <i>elegans</i>                       | -----      | JF832970   | JF832989   | JF833012   |
|  |                | AMNH       | <i>Sagartia</i>         | <i>ornata</i>                        | JF832959   | JF832975   | JF832985   | JF833011   |
|  |                | KUNHM      | <i>Sagartia</i>         | <i>troglodytes</i>                   | EU190746   | KT852107   | EU190872   | FJ489499   |
|  |                | KUNHM      | <i>Sagartiogeton</i>    | <i>laceratus</i>                     | EU190748   | EU190794   | EU190874   | FJ489500   |
|  |                | KUNHM      | <i>Sagartiogeton</i>    | <i>undatus</i>                       | FJ489400   | FJ489417   | FJ489435   | FJ489472   |
|  |                | KUNHM      | <i>Verrillactis</i>     | <i>paguri</i>                        | FJ489414   | FJ489433   | FJ489440   | FJ489503   |

\* Although these species fall within superfamily Metridioidea in most recent phylogenetic studies (see Rodríguez et al. 2014), we follow the classification of Carlgren (1949) until further revision; \*\* this species is not an Aiptasiidae (see Grajales and Rodríguez 2016) but its taxonomic position is unclear, we follow the classification of Carlgren (1949) until further revision. AM: Australian Museum; AMNH: American Museum of Natural History; CAS: California Academy of Sciences; FMNH: Field Museum of Natural History; KUNHM: University of Kansas Natural History Museum; MNHG: Museum of Natural History of Geneva; RMNH: Rijksmuseum van Natuurlijke Historie; SIO: Scripps Oceanic Institution; USNM: U. S. National Museum of Natural History; ZSM: Bavarian State Collection of Zoology; NA: voucher not available.

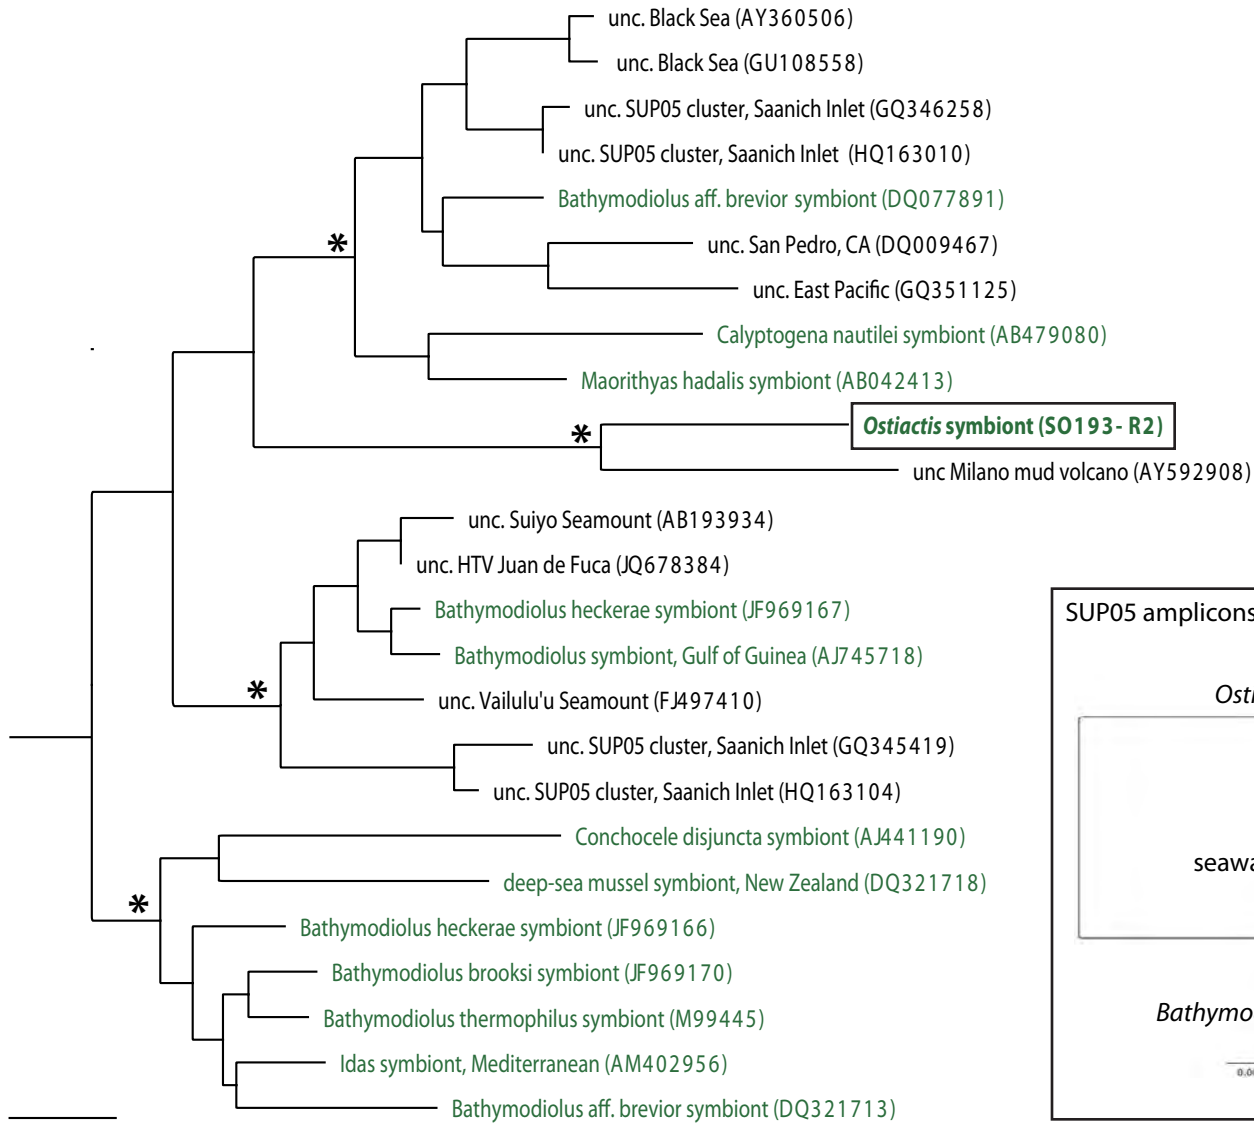

0.0060

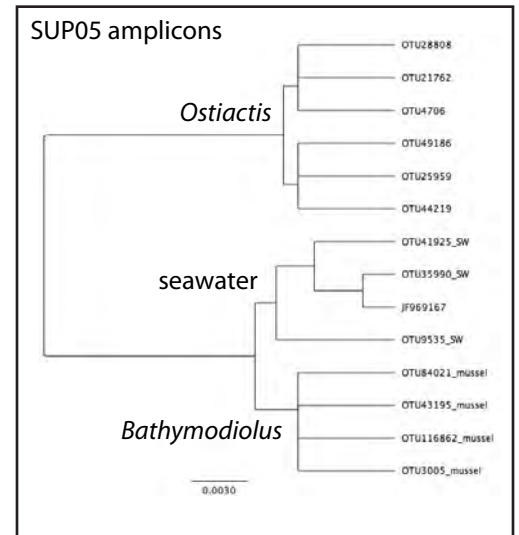

Bacteria

SUP05

combo

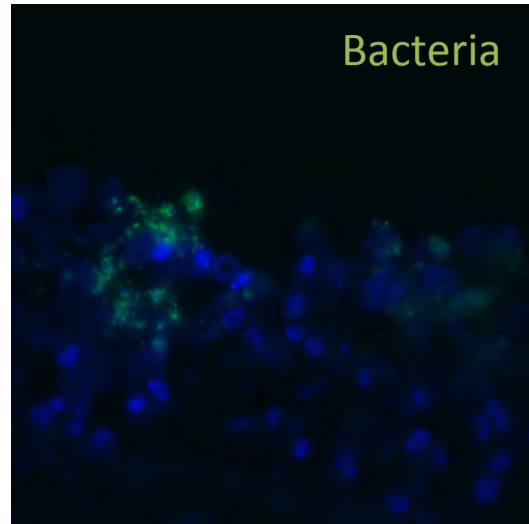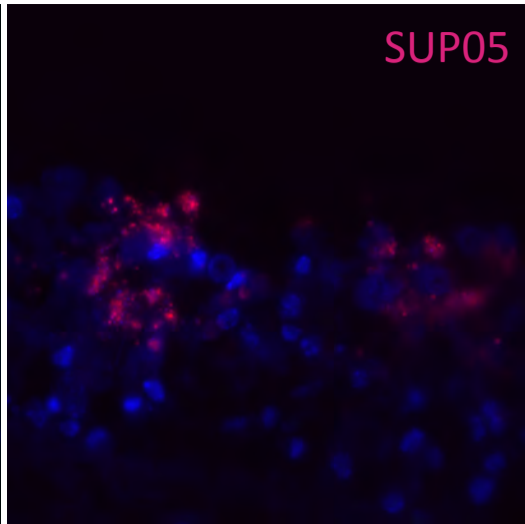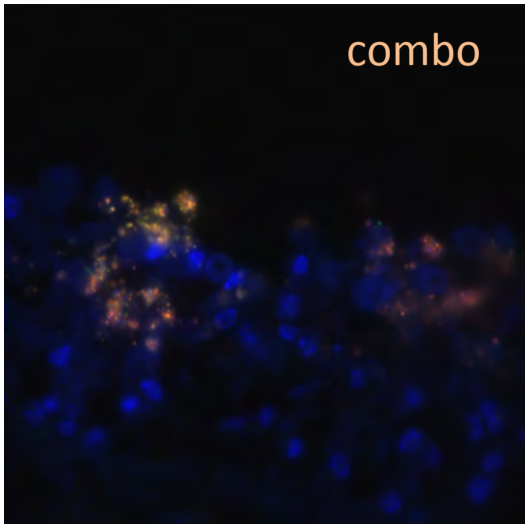

Source: https://www.biorxiv.org/content/10.1101/2020.08.10.245456v1.full.pdf
